# Supplementary material for: Co-evolution within structured bacterial communities results in multiple expansion of CRISPR loci and enhanced immunity
Source: eLife. 2020 Mar 30;9:e53078. doi: 10.7554/eLife.53078 (PMC7105378; doi:10.7554/eLife.53078)
Supplement: Figure 1—source data 1. [file elife-53078-fig1-data1.xlsx]

## Sheet: Fig 1
Spacer name	Sequence
A0	TCGCAATGTGTAGAGATATAGAACTTCACT
A1	TCTAGGTTCGAACTCTTCTTTAAATTTAAT
A2	CTTTTTCTTCAATTGGTCGACGTTTGAATAT
A3	CTTCATGCGTTCCAATTGATCCGTGCCAGT
A4	CTCACGCAGACCTGGCACATTATGAAGCAGT
A5	ATTCATGCAAGTTTTAGGTGTTTTGGTAAT
A6	TTCAGTTAGTGCGCTTAACAAAATACTTAA
B0	CGGAATACACTTCAGATACACAACCTATGCA
C0	GAATACCCTGCGTCAATATATGCTTTCCGT
C1	GTATGTCGCTTTGATACGATCCATCAACAT
D0	GTGAATAATTATGGATCCTATTTTAGGTAA
D1	CATTTTAGATTTCAAAAGTTTAGTATCTAT
D2	ACAGTTTTTACGACTAAAGGAGGCAACCAA
D3	TATATTTCTCCCACTCACGATAAGTCATGAA
E0	CTTACCATAAGTTATTTCTCCAGTTCTATAT
F0	AAATATTGTCGCCAACAAAAATAACATTAT

## Sheet: Fig1 S1
Spacer or barcode name	Sequence
Y Barcode	GCCACAACAC
Y0	TTTTAAGCTATTCATTTTAAAAGGTCATAT
Y1	ACTTATGCCGTTTCTATACTTCACTACAGCA
Y2	CCGAGCTACAACTCGACGACCAAGATGTTG
Y3	AATTGAAATTTCGGTTGATTCTATATCTAA
Y4	ACACACTAAGGCATACACACATAAGTTTAT
Y5	CTTTTTCATAAAAGTAGCGCAATGAGTATGT
W Barcode	AACGGATAGT
W0	GTGCGATTCATGGTAAGCCTATAGGTGGTT
W1	TTAATCGTTCAGGTTTAGTATGTGTGTATA
W2	TCTGAATGAACGTGTAGTTAATACTCCGTTT
V Barcode	CCTACCCATT
V0	CGAACTGAAAACTAACAAAACAAATACTGAG
V1	ATGAATGGATTGAAGAGAACACAGACGAAC
V2	TATGATGGCTAATATGAATGAACATGAATTA
T Barcode	GGTGCCACGC
T0	AAAGTTTCTAACTAAAAATTGATGTGCAGAC
T1	TTCTAATTCGCCATTCATGTTCGTGCCGTT
T2	TTAGCTATTGGTAAGTCGTAAGGTACATAT
T3	ATTTCAATATCGCCGTATGTGTAATGTGC

## Sheet: Fig 2B
Founder spacer	Sequence	fraction mono-spc	fraction multi-spc
B	CGGAATACACTTCAGATACACAACCTATGCA	0.999274	0.000726019
I	GATTGAAAATGATTTAGCTGAAATAGTACG	0.999034	0.00096637
P	ACCAAAATCATTAATATTGCAAGGTTCATA	0.998883	0.00111676
E	CTTACCATAAGTTATTTCTCCAGTTCTATAT	0.997619	0.00238127
O	GATCGTTATCATTCGAAAGGATTAGAATCA	0.997573	0.00242708
J	AAAAAGAAATCGTTAGCACTAATGGGTGAT	0.995611	0.00438893
K	GTGACGTTTGATTCACCCACAACAATATAT	0.99535	0.00464996
M	ATATGAATGATGGACAAAAATCAATCAATAG	0.994445	0.00555456
Q	AATTTGTTCTTGCGCTTCAATAGTGATAGT	0.990078	0.00992235
F	AAATATTGTCGCCAACAAAAATAACATTAT	0.981668	0.0183315
N	GTTACACGGTTATTGGGCAGGCGTACCGAT	0.960573	0.0394265
C	GAATACCCTGCGTCAATATATGCTTTCCGT	0.832434	0.167566
X	CACGCACACCAATTTAAGTTTATTGATGAT	0.673246	0.326754
R	TTCAATAGCTGATTTGATTACCTCTTTACT	0.642502	0.357498
Z	AAAAGAATACTGGATTTAACTAGAATAACT	0.64	0.36
S	GCCCTCATTTCTAATCGTTACATTCACAAT	0.58642	0.41358
G	CAGATTATATTGAAAATACAGATCCTAAAGC	0.562657	0.437343
A	TCGCAATGTGTAGAGATATAGAACTTCACT	0.48	0.52
H	AGACTGATCGCTCAACTTTGCGAAGTCACT	0.457536	0.542464
Y	TTTTAAGCTATTCATTTTAAAAGGTCATAT	0.358025	0.641975
D	GTGAATAATTATGGATCCTATTTTAGGTAA	0.343502	0.656498
L	AATACTTTCTTCTAAAAAACCTAAGTCAAC	0.339198	0.660802
T	AAAGTTTCTAACTAAAAATTGATGTGCAGAC	0.321429	0.678571
U	ATAAAAAGAAAAACGAAGGAGTGTATTAAA	0.194042	0.805958
V	CGAACTGAAAACTAACAAAACAAATACTGAG	0.172616	0.827384
W	GTGCGATTCATGGTAAGCCTATAGGTGGTT	0.150442	0.849558

## Sheet: Fig 3B
Spacer name	Sequence
C0	GAATACCCTGCGTCAATATATGCTTTCCGT
C1	GTATGTCGCTTTGATACGATCCATCAACAT
C2	ACGCAAAAAATAACCACAATCCTAAATTAAT
S0	GCCCTCATTTCTAATCGTTACATTCACAAT
S1	ATGCTCGGGATGGTCAGGGTTGGTATCTAC
S2	AAAACTTGACGTCGAACACTTATTTGTATT
S3	TTACCTAAAATAGGATCCATAATTATTCAC

## Sheet: Figs 4B-C
Colony name	Colony	Spacer 1	Spacer 2	Spacer 3	Spacer 4
R	1	TTCAATAGCTGATTTGATTACCTCTTTACT	ATCAAATGTCTTTTTCACACCTTGCCAATC
	2	TTCAATAGCTGATTTGATTACCTCTTTACT	ACGAGCGAGTGGCACATATCCATGTAGTGAA
	3	TTCAATAGCTGATTTGATTACCTCTTTACT	CATCAGAATCGCCTAAAAATCTATCAACTA	GAAATATTGAAGCAAACGCAAAAACAAGAT
SS	1	CAAAACAAGTTACTTGTTCTTTATGATAATA	GTATGTCGCTTTGATACGATCCATCAACAT
	2	CAAAACAAGTTACTTGTTCTTTATGATAATA	GTGTTCTCTTCAATCCATTCATCTATTGCT
	3	CAAAACAAGTTACTTGTTCTTTATGATAATA	GTGTTCTCTTCAATCCATTCATCTATTGCT
RR	1	ACGTGTCCGATATATTCATACCGTCATTCTTT
	2	ACGTGTCCGATATATTCATACCGTCATTCTTT	GGACCAACAGTCAGATACATGGCCTCTGCC	TAATACAGGTTTTTACAAAAGCTTTACCAT
	3	ACGTGTCCGATATATTCATACCGTCATTCTTT	TCGAAATTAAAGAAACATCAATCACACATT
QQ	1	ATGTGACTCTATTAGAGCCTCAATATGCTT
	2	ATGTGACTCTATTAGAGCCTCAATATGCTT	ATTAGAATTTGTTAAAAGAATGTTAAAGTC
	3	ATGTGACTCTATTAGAGCCTCAATATGCTT	ACCCTTCAAATGTAAAGTCCATTGAAGAAA
PP	1	TACTTCTGACGTGTATATTTGCCAATTGTC
	2	TACTTCTGACGTGTATATTTGCCAATTGTC
	3	TACTTCTGACGTGTATATTTGCCAATTGTC
L	1	AATACTTTCTTCTAAAAAACCTAAGTCAAC	GAAGTTATCCCATTCATGACTTATCGTGAG
	2	AATACTTTCTTCTAAAAAACCTAAGTCAAC	TTAGACTTTTACTTTCCATTACTTAAATCA
	3	AATACTTTCTTCTAAAAAACCTAAGTCAAC	GCACTTATAACGGATTGTTCTATTTGTTCA	AAATGAATCAGCTGAGAATTTTATTACATGA	TTCATTTTCTTTTTGTATGCGTCAATGAGT
OO	1	TTCAGCTTTTTGCTTATCTGTCTTCGGAAT
	2	TTCAGCTTTTTGCTTATCTGTCTTCGGAAT	ATAATTTTATTATCGCTATTGCGTTAGATT
	3	TTCAGCTTTTTGCTTATCTGTCTTCGGAAT	CTTTTTCATAAAAGTAGCGCAATGAGTATGT
D	1	GTGAATAATTATGGATCCTATTTTAGGTAA	CATTTTAGATTTCAAAAGTTTAGTATCTAT	ACAGTTTTTACGACTAAAGGAGGCAACCAA
	2	GTGAATAATTATGGATCCTATTTTAGGTAA	CATTTTAGATTTCAAAAGTTTAGTATCTAT
	3	GTGAATAATTATGGATCCTATTTTAGGTAA
MM	1	CGATTTTTAGTGCGCGCTCTAGATTTAACTT	AATCAATCAATAGTGGCGTTCAAGAACTTA
	2	CGATTTTTAGTGCGCGCTCTAGATTTAACTT
	3	CGATTTTTAGTGCGCGCTCTAGATTTAACTT
LL	1	TACTTCTGACGTGTATATTTGCCAATTGTC	CGGATTCGATTTTAAGCTATTCATTTTAAA
	2	TACTTCTGACGTGTATATTTGCCAATTGTC	TAACGACGGTACTTATTCCGTCGTTGCTAC
	3	TACTTCTGACGTGTATATTTGCCAATTGTC	GTAAACCTGTCTATATCAGGGAATACTGCT	AAAACAATTGATTGAATTAGTTACTCGATT
KK	1	AACATATCACGTTCAAATAATGATACTGGT	GTAATAATATTTTTAATAACCTCAACATCT
	2	AACATATCACGTTCAAATAATGATACTGGT	ATTATTTGATGCTAACGGGAACGAGATTAT	GTGCGATTCATGGTAAGCCTATAGGTGGTT	AGGTTTAAGCAAGAGGTATTTAAATATGTT
	3	AACATATCACGTTCAAATAATGATACTGGT	AACACTCAAGTTTAGTTTTTAAAAATTCTT
H	1	AGACTGATCGCTCAACTTTGCGAAGTCACT	GAAATATTGAAGCAAACGCAAAAACAAGAT
	3	AGACTGATCGCTCAACTTTGCGAAGTCACT	CGTATAGGTACAATGTTGACTGATGACTAT	ATGGTATTCAATTAAAAGATTTTATGTTTGA
	5	AGACTGATCGCTCAACTTTGCGAAGTCACT	ACACAACCTAGAAACAATAAGTAAACTTTC	CGTTTTCCCGTCAAAGTATGGTGGCGGAGC
Q	1	AATTTGTTCTTGCGCTTCAATAGTGATAGT
	2	AATTTGTTCTTGCGCTTCAATAGTGATAGT
	3	AATTTGTTCTTGCGCTTCAATAGTGATAGT
P	1	ACCAAAATCATTAATATTGCAAGGTTCATA
	2	ACCAAAATCATTAATATTGCAAGGTTCATA
	3	ACCAAAATCATTAATATTGCAAGGTTCATA
O	1	GATCGTTATCATTCGAAAGGATTAGAATCA
	2	GATCGTTATCATTCGAAAGGATTAGAATCA
	3	GATCGTTATCATTCGAAAGGATTAGAATCA
N	1	GTTACACGGTTATTGGGCAGGCGTACCGAT	AAAACATCCAGTGACATGCTTGGGTGAACA	ATTAGACTTTTACTTTCCATTACTTAAATCA
	2	GTTACACGGTTATTGGGCAGGCGTACCGAT	AAAACATCCAGTGACATGCTTGGGTGAACA
	3	GTTACACGGTTATTGGGCAGGCGTACCGAT	AAAACATCCAGTGACATGCTTGGGTGAACA
M	1	ATATGAATGATGGACAAAAATCAATCAATAG
	2	ATATGAATGATGGACAAAAATCAATCAATAG
	3	ATATGAATGATGGACAAAAATCAATCAATAG
II	1	TTCAGCATCTCCTATCATCTCTTTGTTGTT	TTCAATATCAACTATGAAGGGGATATCAAT
	2	TTCAGCATCTCCTATCATCTCTTTGTTGTT	TTCAATATCAACTATGAAGGGGATATCAAT
	3	TTCAGCATCTCCTATCATCTCTTTGTTGTT	TTCAATATCAACTATGAAGGGGATATCAAT
JJ	1	CGAATATGAACGACACAAATGATTTAGGGT	TCTATGTCTTCTAAATTCAGTGATGTATTC
	2	CGAATATGAACGACACAAATGATTTAGGGT	TCGCAAAAGCAGTCAAAGCTAAAGGGCATA
	3	CGAATATGAACGACACAAATGATTTAGGGT	TCGCAAAAGCAGTCAAAGCTAAAGGGCATA
HH	1	CTTCATGCGTTCCAATTGATCCGTGCCAGT
	2	CTTCATGCGTTCCAATTGATCCGTGCCAGT
	3	CTTCATGCGTTCCAATTGATCCGTGCCAGT
BB	1	GAAATATTGAAGCAAACGCAAAAACAAGAT
	2	GAAATATTGAAGCAAACGCAAAAACAAGAT
	3	GAAATATTGAAGCAAACGCAAAAACAAGAT
GG	1	ATCATCAAAATACTGATATTCAACTTCTGT	AGCCTATGCCAATTTTATTAAAAAGTCTACA
	2	ATCATCAAAATACTGATATTCAACTTCTGT	AGCCTATGCCAATTTTATTAAAAAGTCTACA
	3	ATCATCAAAATACTGATATTCAACTTCTGT	AGCCTATGCCAATTTTATTAAAAAGTCTACA
J	1	AAAAAGAAATCGTTAGCACTAATGGGTGAT
	2	AAAAAGAAATCGTTAGCACTAATGGGTGAT
	3	AAAAAGAAATCGTTAGCACTAATGGGTGAT
I	1	GATTGAAAATGATTTAGCTGAAATAGTACG
	2	GATTGAAAATGATTTAGCTGAAATAGTACG
	3	GATTGAAAATGATTTAGCTGAAATAGTACG
FF	1	AAGAAAACAGTGACAGAAACTATTGAGTACG	AAAATGGCAGCAATTTGCGGATATGGTGCT
	2	AAGAAAACAGTGACAGAAACTATTGAGTACG	TTGGATATGACGACCAAGATTTAGCGTTTTA
	3	AAGAAAACAGTGACAGAAACTATTGAGTACG
EE	1	TCTTCACTCATACCCATACCGCGTAACACA	AATCAAATACAAGCGTTAATACGTGGTGTT	CGAAGAACCGTCATCAACACCATCTTGTCCA
	2	TCTTCACTCATACCCATACCGCGTAACACA	CAATTTTTAAAGCACGTTGCATAATCATTTC
	3	TCTTCACTCATACCCATACCGCGTAACACA	TTTTAAATTGTCATACTCTAGTAATTCGTC
CC	1	GTACCACAAAAACATTCACGTGATCCGTAC	AGTGGACAGTTCCTAATGAACATAAATCAA
	2	GTACCACAAAAACATTCACGTGATCCGTAC	AGTGGACAGTTCCTAATGAACATAAATCAA
	3	GTACCACAAAAACATTCACGTGATCCGTAC	AGTGGACAGTTCCTAATGAACATAAATCAA

## Sheet: Fig 5A-B
Spacer name	Sequence
UU0	AATCAATCAATAGTGGCGTTCAAGAACTTA
XX0	GAACTTGTATTGAACAAAGGTTATATAGTT
XX1	GCGACAATATTTTAGAACCTACATACTCAT
XX2	ATTTTCTTCAGCTTTTTGCTTATCTGTCTT

## Sheet: Fig 5 S1D-G
Spacer name	Sequence
AB0	CAAAAAGAAATCGTTAGCACTAATGGGTGAT
AC0	GAAACACAATGCGAGAAAAGTAAGAGTAAT
AD0	GCTAATGACAGTCCATTATTTGATGCTAAC
AD1	TTAAATGGACNGCAAAAGATTTCTTTAATG
AD2	TACGATATTACCGATTAACTGCATAATAGT
AD3	ATGGTCGAAGAAAAAGAAAAGTGAAATGGT
AD4	GAAGCATCTGATGCTTGTAACGTCGTTAACG
AD5	ATTAATGCCGTTGTTCAAATTTGTGTCTCA
AD6	GTTAGCAGTATTTGGAGCACTGTTACAAGT
AE0	ATCATCGTTTAAGATATAGAATGCTTTGGT
AE1	TAGAAAATTTATACATTGATTATTCACCAAC
AE2	TGATAGAGGGTTTATATTCACAACTTGCCA
AE3	AATATTGTCGCCAACAAAAATAACATTATA

## Sheet: Fig 7A
Sector	Colony	Spacer 1	Spacer 2	Spacer 3
C2-alpha	1	tactattataccagacttggcacggtattg	aatgatacttggacccgaaaccttgaaaca
	2	tactattataccagacttggcacggtattg	agatgccagtcagtttccttgcttgttcta
	3	tactattataccagacttggcacggtattg	aatgatacttggacccgaaaccttgaaaca
	4	tactattataccagacttggcacggtattg	aatgatacttggacccgaaaccttgaaaca
C2-beta	1	tactattataccagacttggcacggtattg	ttatggagatggttgattacgcaatcaact
	2	tactattataccagacttggcacggtattg	ttatggagatggttgattacgcaatcaact
	3	tactattataccagacttggcacggtattg	tacagtaattacggaaagaatactgatgac
	4	tactattataccagacttggcacggtattg	tacagtaattacggaaagaatactgatgac
C2-gamma	1	tactattataccagacttggcacggtattg	tataacacaaaaaaagccccagcataatgc
	2	tactattataccagacttggcacggtattg	cgttgatttagcccaatatgtccacctcct
	3	tactattataccagacttggcacggtattg	cacggcttaactcggttacgaaagtgtcgt	tatcaattgcggaaatgtggctagctcct
	4	tactattataccagacttggcacggtattg	cacggcttaactcggttacgaaagtgtcgt

## Sheet: Fig 7CD
Spacer name	Sequence
A2-0	agaacaagtttctgaacaaaaaactgattt
A3-0	agatgccagtcagtttccttgcttgttcta
B1-0	atatactgtgttaattgctgtgttaattgt
B1-1	ctaacatcaaggtatccttcaatggtgcaa
B1-2	tacgtcttgcaatcgtcaaaccgttttccc
B1-3	aaggaagacagtactaatccttctgattac
B1-4	atcatttcatcatattttgcgattttttta
B2-0	atatactgtgttaattgctgtgttaattg
B2-1	atggcgtagcagcgcaattcaaagagattg
B2-2	gatagagatattttgggtaaacacttgccc
B2-3	gtaaatcacctctagtgcttcttttaacaa
B2-4	gttgagccatacctgcaccagcttgagcaa
B3-0	caaggactttcgaggacaccgctcttggtg
C2-0	tactattataccagacttggcacggtattg
C2-1	cagtagtggtaattgattagcttattctac
