# Supplementary material for: Co-evolution within structured bacterial communities results in multiple expansion of CRISPR loci and enhanced immunity
Source: eLife. 2020 Mar 30;9:e53078. doi: 10.7554/eLife.53078 (PMC7105378; doi:10.7554/eLife.53078)
Supplement: Figure 2—source data 1. [file elife-53078-fig2-data1.xlsx]

## Sheet: Summary
Colony	Spacer 1	position	fraction mono-spc	fraction multi-spc
B	CGGAATACACTTCAGATACACAACCTATGCA	30549	0.999274	0.000726019
I	GATTGAAAATGATTTAGCTGAAATAGTACG	22231	0.999034	0.00096637
P	ACCAAAATCATTAATATTGCAAGGTTCATA	8009	0.998883	0.00111676
E	CTTACCATAAGTTATTTCTCCAGTTCTATAT	30341	0.997619	0.00238127
O	GATCGTTATCATTCGAAAGGATTAGAATCA	19074	0.997573	0.00242708
J	AAAAAGAAATCGTTAGCACTAATGGGTGAT	20197	0.995611	0.00438893
K	GTGACGTTTGATTCACCCACAACAATATAT	21858	0.99535	0.00464996
M	ATATGAATGATGGACAAAAATCAATCAATAG	7039	0.994445	0.00555456
Q	AATTTGTTCTTGCGCTTCAATAGTGATAGT	4368	0.990078	0.00992235
F	AAATATTGTCGCCAACAAAAATAACATTAT	16783	0.981668	0.0183315
N	GTTACACGGTTATTGGGCAGGCGTACCGAT	29178	0.960573	0.0394265
C	GAATACCCTGCGTCAATATATGCTTTCCGT	14648	0.832434	0.167566
X	CACGCACACCAATTTAAGTTTATTGATGAT	15893	0.673246	0.326754
R	TTCAATAGCTGATTTGATTACCTCTTTACT	18049	0.642502	0.357498
Z	AAAAGAATACTGGATTTAACTAGAATAACT	25401	0.64	0.36
S	GCCCTCATTTCTAATCGTTACATTCACAAT	26667	0.58642	0.41358
G	CAGATTATATTGAAAATACAGATCCTAAAGC	15556	0.562657	0.437343
A	TCGCAATGTGTAGAGATATAGAACTTCACT	5355	0.48	0.52
H	AGACTGATCGCTCAACTTTGCGAAGTCACT	13774	0.457536	0.542464
Y	TTTTAAGCTATTCATTTTAAAAGGTCATAT	3371	0.358025	0.641975
D	GTGAATAATTATGGATCCTATTTTAGGTAA	6824	0.343502	0.656498
L	AATACTTTCTTCTAAAAAACCTAAGTCAAC	21445	0.339198	0.660802
T	AAAGTTTCTAACTAAAAATTGATGTGCAGAC	31446	0.321429	0.678571
U	ATAAAAAGAAAAACGAAGGAGTGTATTAAA	22101	0.194042	0.805958
V	CGAACTGAAAACTAACAAAACAAATACTGAG	33658	0.172616	0.827384
W	GTGCGATTCATGGTAAGCCTATAGGTGGTT	39238	0.150442	0.849558

## Sheet: Z
Colony Z
Spacer 1	position	spacer2	position	spacer3	spacer4	# reads	spc1 to spc2 distance	fraction reads
AAAAGAATACTGGATTTAACTAGAATAACT	25401					4099		0.636194
AAAAGAATACTGGATTTAACTAGAATAACT	25401	AAATATTGTCGCCAACAAAAATAACATTAT	16783			1	-8618	0.000155207
AAAAGAATACTGGATTTAACTAGAATAACT	25401	AAGCAAGATGTAGTATTAGGAGACTTTACA	28659			1	3258	0.000155207
AAAAGAATACTGGATTTAACTAGAATAACT	25401	CATGAATACTTGTCCTAATACTTGTAATAT	25722			1	321	0.000155207
AAAAGAATACTGGATTTAACTAGAATAACT	25401	TCGAAATTAAAGAAACATCAATCACACAT	2395			4	17359	0.000620829
AAAAGAATACTGGATTTAACTAGAATAACT	25401	TCGAAATTAAAGAAACATCAATCACACATT	2395			2325	17359	0.360857
AAAAGAATACTGGATTTAACTAGAATAACT	25401	TCGAAATTAAAGAAACATCAATCACACATT	2395	AAAAGGTGTTGAGTCTAAATTTAAATCGAG		1	17359	0.000155207
AAAAGAATACTGGATTTAACTAGAATAACT	25401	TCGAAATTAAAGAAACATCAATCACACATT	2395	AAATGACGGATGTTAAAATTAAAACTATTTC		2	17359	0.000310414
AAAAGAATACTGGATTTAACTAGAATAACT	25401	TCGAAATTAAAGAAACATCAATCACACATT	2395	AGCAGATTCAGTATAATTTTCAGCATCTTT		1	17359	0.000155207
AAAAGAATACTGGATTTAACTAGAATAACT	25401	TCGAAATTAAAGAAACATCAATCACACATT	2395	AGGCGCACCTGCAGCTTCAAACCACTCTTT		2	17359	0.000310414
AAAAGAATACTGGATTTAACTAGAATAACT	25401	TCGAAATTAAAGAAACATCAATCACACATT	2395	CAAATCTATTCAAGATACTATCGAAGCTGT		1	17359	0.000155207
AAAAGAATACTGGATTTAACTAGAATAACT	25401	TCGAAATTAAAGAAACATCAATCACACATT	2395	TCGAAATTAAAGAAACATCAAGCACACATT		1	17359	0.000155207
AAAAGAATACTGGATTTAACTAGAATAACT	25401	TCGAAATTAAAGAAACATCAATCACACATT	2395	TCGAAATTAAAGAAACATCAATAACACATT		1	17359	0.000155207
AAAAGAATACTGGATTTAACTAGAATAACT	25401	TCGAAATTAAAGAAACATCAATCACACATT	2395	TGAACGAATTGACAGTATGTACAGATTAATA		1	17359	0.000155207
AAAAGAATACTGGATTTAACTAGAATAACT	25401	TCGAAATTAAAGAAACATCAATCACACATT	2395	TGTTGGCACCACTCTATAGCAGTAGCGTAT		1	17359	0.000155207
AAAAGAATACTGGATTTAACTAGAATAACT	25401	TCGAAATTAAAGAAACATCAATCACACATT	2395	TTACTATGCAACAAGAGTGCCGGATTTACC		1	17359	0.000155207

## Sheet: A
Colony A
Spacer 1	position	spacer2	position	spacer3	spacer4	# reads	spc1 to spc2 distance	fraction reads
TCGCAATGTGTAGAGATATAGAACTTCACT	5355					347		0.481276
TCGCAATGTGTAGAGATATAGAACTTCACT	5355	AAGATTCTACTGGATCTAAGTCAGTTTCAGC	22196			1	16841	0.00138696
TCGCAATGTGTAGAGATATAGAACTTCACT	5355	ACGTACAACTTGATGAATTAGCTGACATGT	12039			1	6684	0.00138696
TCGCAATGTGTAGAGATATAGAACTTCACT	5355	AGACATATTAGATCGAGTCAAGGAGGTTTT	12392			1	7037	0.00138696
TCGCAATGTGTAGAGATATAGAACTTCACT	5355	ATGAATGGATTGAAGAGAACACAGACGAAC	3510			2	-1845	0.00277393
TCGCAATGTGTAGAGATATAGAACTTCACT	5355	CAGTGATTGCCGGATTAGTACCTGCAATAA	24310	CGATACGAAAATGTGGATTCTCGGTTTGA		1	18955	0.00138696
TCGCAATGTGTAGAGATATAGAACTTCACT	5355	CATTTGGTTATAAGTGACATCGAACCAGTA	9762			2	4407	0.00277393
TCGCAATGTGTAGAGATATAGAACTTCACT	5355	CCATTTTAGATTTCAAAAGTTTAGTATCTAT	728			4	-4627	0.00554785
TCGCAATGTGTAGAGATATAGAACTTCACT	5355	CTTCATGCGTTCCAATTGATCCGTGCCAGT	7625			93	2270	0.128988
TCGCAATGTGTAGAGATATAGAACTTCACT	5355	CTTCATGCGTTCCAATTGATCCGTGCCAGT	7625	CATTTGGTTATAAGTGACATCGAACCAGTA		1	2270	0.00138696
TCGCAATGTGTAGAGATATAGAACTTCACT	5355	CTTCATGCGTTCCAATTGATCCGTGCCAGT	7625	CCTCACATTTCAATCCTTTTTCGACATGAGT		2	2270	0.00277393
TCGCAATGTGTAGAGATATAGAACTTCACT	5355	CTTTTTCTTCAATTGGTCGACGTTTGAATAT	16441			2	11086	0.00277393
TCGCAATGTGTAGAGATATAGAACTTCACT	5355	GAATAACTCACGTTCCATTGAATACTGTGT	2397			1	-2958	0.00138696
TCGCAATGTGTAGAGATATAGAACTTCACT	5355	GCTAAGACTGTGAAGCATAATACTGCTACT	3117			1	-2238	0.00138696
TCGCAATGTGTAGAGATATAGAACTTCACT	5355	GTCATATCCAAATTGGCCACTGCTTTCAAA	5146			5	-209	0.00693481
TCGCAATGTGTAGAGATATAGAACTTCACT	5355	TCATGAAAAAGTGAATTGCTAGTAGTGTGT	1210			1	-4145	0.00138696
TCGCAATGTGTAGAGATATAGAACTTCACT	5355	TCGAATGTCTTGCGTCCTGCGTCAATTGCA	21675			1	16320	0.00138696
TCGCAATGTGTAGAGATATAGAACTTCACT	5355	TCTAATTGCTTCTACTACGTCCGTAATGCT	4575			10	-780	0.0138696
TCGCAATGTGTAGAGATATAGAACTTCACT	5355	TCTAGGTTCGAACTCTTCTTTAAATTTAAT	33448			229	-12272	0.317614
TCGCAATGTGTAGAGATATAGAACTTCACT	5355	TCTAGGTTCGAACTCTTCTTTAAATTTAAT	33448	AAAATGTTTTAACACCTATTAACGTAGTAT		1	-12272	0.00138696
TCGCAATGTGTAGAGATATAGAACTTCACT	5355	TCTAGGTTCGAACTCTTCTTTAAATTTAAT	33448	AATTTCGCCGTTAGTGAAAACAAACTTTCT		1	-12272	0.00138696
TCGCAATGTGTAGAGATATAGAACTTCACT	5355	TCTAGGTTCGAACTCTTCTTTAAATTTAAT	33448	CATTTGGTTATAAGTGACATCGAACCAGTA		2	-12272	0.00277393
TCGCAATGTGTAGAGATATAGAACTTCACT	5355	TCTAGGTTCGAACTCTTCTTTAAATTTAAT	33448	CTTATTTTGCGTTAGAATTGACACCTCAAGA		1	-12272	0.00138696
TCGCAATGTGTAGAGATATAGAACTTCACT	5355	TCTAGGTTCGAACTCTTCTTTAAATTTAAT	33448	CTTTTTCTTCAATTGGTCGACGTTTGAATAT		1	-12272	0.00138696
TCGCAATGTGTAGAGATATAGAACTTCACT	5355	TCTAGGTTCGAACTCTTCTTTAAATTTAAT	33448	GTAGTGTTGGCATTAAACGAATGAACTCAAT		1	-12272	0.00138696
TCGCAATGTGTAGAGATATAGAACTTCACT	5355	TCTAGGTTCGAACTCTTCTTTAAATTTAAT	33448	TTTAGCGATATTAATTATGCTCGTAAGAAT		1	-12272	0.00138696
TCGCAATGTGTAGAGATATAGAACTTCACT	5355	TGGAGAATTATGGATTTATTCAGCTGTATT	30245			1	-15475	0.00138696
TCGCAATGTGTAGAGATATAGAACTTCACT	5355	TGTATGTCGCTTTGATACGATCCATCAACAT	8154			1	2799	0.00138696
TCGCAATGTGTAGAGATATAGAACTTCACT	5355	TGTCATCTCAAGCTTTTACTAAACAACAAG	37234			1	-8486	0.00138696
TCGCAATGTGTAGAGATATAGAACTTCACT	5355	TTCAGCATCTCCTATCATCTCTTTGTTGTT	16998			1	11643	0.00138696
TCGCAATGTGTAGAGATATAGAACTTCACT	5355	TTGATGATGTGGATATCGAAAAAGAAGCGC	9310			1	3955	0.00138696
TCGCAATGTGTAGAGATATAGAACTTCACT	5355	TTTAGCCACTCATATTCTTCAAAGGCCTTT	14804	GTGCAATTAACGCTGATAAAAGTAAACTAT		1	9449	0.00138696
TCGCAATGTGTAGAGATATAGAACTTCACT	5355	TTTATTTTGCGTTAGAATTGACACCTCAAGA	842			1	-4513	0.00138696
TCGCAATGTGTAGAGATATAGAACTTCACT	5355	TTTGATGATAAATACCACTTGCATGACTCG	5764			1	409	0.00138696

## Sheet: Y
Colony Y
Spacer 1	position	spacer2	position	spacer3	spacer4	# reads	spc1 to spc2 distance	fraction reads
TTTTAAGCTATTCATTTTAAAAGGTCATAT	3371					29		0.358025
TTTTAAGCTATTCATTTTAAAAGGTCATAT	3371	AAAACAATTGATTGAATTAGTTACTCGATT	4836			2	1465	0.0246914
TTTTAAGCTATTCATTTTAAAAGGTCATAT	3371	AAAATGTTTTAACACCTATTAACGTAGTAT	1478			2	-1893	0.0246914
TTTTAAGCTATTCATTTTAAAAGGTCATAT	3371	AAACAGTGACAGAAACTATTGAGTACGAGG	3759			1	388	0.0123457
TTTTAAGCTATTCATTTTAAAAGGTCATAT	3371	AACATATCACGTTCAAATAATGATACTGGT	20354			1	16983	0.0123457
TTTTAAGCTATTCATTTTAAAAGGTCATAT	3371	ACACACTAAGGCATACACACATAAGTTTAT	266			1	-3105	0.0123457
TTTTAAGCTATTCATTTTAAAAGGTCATAT	3371	ACATAAAATCCTTCCTTAGATATGACTGTG	11258			3	7887	0.037037
TTTTAAGCTATTCATTTTAAAAGGTCATAT	3371	ACCATCGTCTTTACGTGCTCTCATTACAGT	18541			1	15170	0.0123457
TTTTAAGCTATTCATTTTAAAAGGTCATAT	3371	ACTTATGCCGTTTCTATACTTCACTACAGCA	3123			1	-248	0.0123457
TTTTAAGCTATTCATTTTAAAAGGTCATAT	3371	ACTTATGCCGTTTCTATACTTCACTACAGCA	3123	AAACAAGTCCATTCACATTCCAGCAAGCAC		1	-248	0.0123457
TTTTAAGCTATTCATTTTAAAAGGTCATAT	3371	ACTTATGCCGTTTCTATACTTCACTACAGCA	3123	CCGAGCTACAACTCGACGACCAAGATGTTG		3	-248	0.037037
TTTTAAGCTATTCATTTTAAAAGGTCATAT	3371	ATATTCATCAGATTCCAATACTACGTTAAT	1431			1	-1940	0.0123457
TTTTAAGCTATTCATTTTAAAAGGTCATAT	3371	ATTCACAACTTGCCAAGGAAATCCTATGCA	367			1	-3004	0.0123457
TTTTAAGCTATTCATTTTAAAAGGTCATAT	3371	ATTCTCATCTACGACATAAGCATGTTTAAT	3470			1	99	0.0123457
TTTTAAGCTATTCATTTTAAAAGGTCATAT	3371	ATTTAAACCACACCTTAAAACGCTAAATCT	5181			2	1810	0.0246914
TTTTAAGCTATTCATTTTAAAAGGTCATAT	3371	CCAACAGGCACTCTGATTAATATTTCTAAAT	2978			5	-393	0.0617284
TTTTAAGCTATTCATTTTAAAAGGTCATAT	3371	CCAACAGGCACTCTGATTAATATTTCTAAAT	2978	GTCTTTACGGCGTATTGTTGTACCACTCAT		1	-393	0.0123457
TTTTAAGCTATTCATTTTAAAAGGTCATAT	3371	CGAAATCATACGCAAAAATATTCATGTTAA	3331			2	-40	0.0246914
TTTTAAGCTATTCATTTTAAAAGGTCATAT	3371	CGGATTTTTCATTTATTAAACCTTACAAAAA	4979			1	1608	0.0123457
TTTTAAGCTATTCATTTTAAAAGGTCATAT	3371	CTAAAAACAAAAAAAATCCACCAGTGCCAGC	39294	GATATGACGATGACGTTAATCTGGAAAGATG		1	-4442	0.0123457
TTTTAAGCTATTCATTTTAAAAGGTCATAT	3371	GAATATAGATCCCTATAATGTTATTTTTGT	16739			1	13368	0.0123457
TTTTAAGCTATTCATTTTAAAAGGTCATAT	3371	GCTTGAGAAGAAGATTGAACAAATAGATAA	14948			1	11577	0.0123457
TTTTAAGCTATTCATTTTAAAAGGTCATAT	3371	TAACGACGGTACTTATTCCGTCGTTGCTAC	5208			1	1837	0.0123457
TTTTAAGCTATTCATTTTAAAAGGTCATAT	3371	TAGGGCAATGATTGAAGAATTTGATGATAA	4403			1	1032	0.0123457
TTTTAAGCTATTCATTTTAAAAGGTCATAT	3371	TCAATTGTTTTTCTTGGAAATCATATTTATA	4847			1	1476	0.0123457
TTTTAAGCTATTCATTTTAAAAGGTCATAT	3371	TGAACGAATTGTCAGTATGTACAGATTAAT	4211			1	840	0.0123457
TTTTAAGCTATTCATTTTAAAAGGTCATAT	3371	TTAAATATTTGATAACAACATTATACACGAA	1711			2	-1660	0.0246914
TTTTAAGCTATTCATTTTAAAAGGTCATAT	3371	TTAACGGTATGGAAGAAGCGAGTATCAATA	3705			1	334	0.0123457
TTTTAAGCTATTCATTTTAAAAGGTCATAT	3371	TTAATTCATGTTCATTCATATTAGCCATCAT	13196			1	9825	0.0123457
TTTTAAGCTATTCATTTTAAAAGGTCATAT	3371	TTGAGACTGAAGTTCACTATGAAAACTACG	10961			7	7590	0.0864198
TTTTAAGCTATTCATTTTAAAAGGTCATAT	3371	TTTCGCACTGTTTACACCAATAAATAGCTT	18454			1	15083	0.0123457
TTTTAAGCTATTCATTTTAAAAGGTCATAT	3371	TTTTCAAAGAATAAAAAAACTGCTACTTGT	3209			3	-162	0.037037

## Sheet: X
Colony X
Spacer 1	position	spacer2	position	spacer3	spacer4	# reads	spc1 to spc2 distance	fraction reads
CACGCACACCAATTTAAGTTTATTGATGAT	15893	GGACGACATACCTATCAAAGAATACTTTGC	15777			1	-116	0.00219298
CACGCACACCAATTTAAGTTTATTGATGAT	15893	CTTTAATCGTATTCTCATTCAAATCAAAGT	15767			1	-126	0.00219298
CACGCACACCAATTTAAGTTTATTGATGAT	15893	TGAATGAGAATACGATTAAAGCAGATGAAC	15746			1	-147	0.00219298
CACGCACACCAATTTAAGTTTATTGATGAT	15893	TGTTCTATGAACGTAATATCAACGGTATGT	15677			1	-216	0.00219298
CACGCACACCAATTTAAGTTTATTGATGAT	15893	GAGAGCCTATAAAAGAATTTGATGACGTGT	16172			1	279	0.00219298
CACGCACACCAATTTAAGTTTATTGATGAT	15893	ATGTGACTCTATTAGAGCCTCAATATGCTT	16344			1	451	0.00219298
CACGCACACCAATTTAAGTTTATTGATGAT	15893	ACCAGTTTCAAAATCTTCTTTTTCTTCAAT	16458			1	565	0.00219298
CACGCACACCAATTTAAGTTTATTGATGAT	15893	TTCTGAAATAGGTAAAATGGCAGCAATTTG	16655			2	762	0.00438596
CACGCACACCAATTTAAGTTTATTGATGAT	15893	GCGCTACTTTTATGAAAAAGATGATGATAA	16802			3	909	0.00657895
CACGCACACCAATTTAAGTTTATTGATGAT	15893	TATTTAAATAACTAGAGTAATTAACATAA	14503			1	-1390	0.00219298
CACGCACACCAATTTAAGTTTATTGATGAT	15893	AGTTGTACCCTTTACGCTTTAATGCAGATA	17428			1	1535	0.00219298
CACGCACACCAATTTAAGTTTATTGATGAT	15893	ACTGGAATGTTACGAGTGAACTTAAATATC	17483			1	1590	0.00219298
CACGCACACCAATTTAAGTTTATTGATGAT	15893	TGAAGGGACAAGTTTCAGAACGAACAAGGTT	17518			1	1625	0.00219298
CACGCACACCAATTTAAGTTTATTGATGAT	15893	ATTTAATGACAAATTACCTGACATAGATGA	17615			1	1722	0.00219298
CACGCACACCAATTTAAGTTTATTGATGAT	15893	TGAAGTGTAATGTATTAGCTGATGTAATAC	13850			1	-2043	0.00219298
CACGCACACCAATTTAAGTTTATTGATGAT	15893	ATTGAAAAAGATACGTATGCACATTACACA	18105			1	2212	0.00219298
CACGCACACCAATTTAAGTTTATTGATGAT	15893	ATTTATATCCGATCTTATACGAAGTAAAGA	13587			1	-2306	0.00219298
CACGCACACCAATTTAAGTTTATTGATGAT	15893	CGTTTTGTAACTCTATTATCTCTTCGTACA	18711			1	2818	0.00219298
CACGCACACCAATTTAAGTTTATTGATGAT	15893	AATCTTGAGGATCTAATCGAACAAGAAGTA	19115			2	3222	0.00438596
CACGCACACCAATTTAAGTTTATTGATGAT	15893	GCTATGTCTATCACTATAACAATTGCTTGT	12283			1	-3610	0.00219298
CACGCACACCAATTTAAGTTTATTGATGAT	15893	TTTTAAAAACGGCGTTATTCCAGCAGAACA	19565			1	3672	0.00219298
CACGCACACCAATTTAAGTTTATTGATGAT	15893	AGTTGAATTCTTTGAATGGTTTAATACAT	11965			1	-3928	0.00219298
CACGCACACCAATTTAAGTTTATTGATGAT	15893	ATGCTATTTTGCTATCTCGTAAGTTCAGCGT	11961			2	-3932	0.00438596
CACGCACACCAATTTAAGTTTATTGATGAT	15893	GAAAGCGCAAGCGTTTGATGAAATACTTGA	11715			1	-4178	0.00219298
CACGCACACCAATTTAAGTTTATTGATGAT	15893	ATACGACAAAAAGAAATCGTTAGCACTAAT	20189			2	4296	0.00438596
CACGCACACCAATTTAAGTTTATTGATGAT	15893	ACTATGAAACAGGGGTCCAACTAGGTGTAA	11341			1	-4552	0.00219298
CACGCACACCAATTTAAGTTTATTGATGAT	15893	GATTAGCCATCATATCTCCTCCTATTCAGT	20454			6	4561	0.0131579
CACGCACACCAATTTAAGTTTATTGATGAT	15893	GATTAGCCATCATATCTCCTCCTATTCAGT	20454	TAAAGACAAAAACAACAACGAAATATATGC		1	4561	0.00219298
CACGCACACCAATTTAAGTTTATTGATGAT	15893	TCCTGTATATTCGTCCCACACTCGATATTT	10930			1	-4963	0.00219298
CACGCACACCAATTTAAGTTTATTGATGAT	15893	ATACCTGTTTAATACTCCACTAATGTAATC	20905			1	5012	0.00219298
CACGCACACCAATTTAAGTTTATTGATGAT	15893	CAAAGTACGAATGAGGAAGAAGCCACGAATA	10784			1	-5109	0.00219298
CACGCACACCAATTTAAGTTTATTGATGAT	15893	TCATATCATCGTTTAAGATATAGAATGCTT	10663			3	-5230	0.00657895
CACGCACACCAATTTAAGTTTATTGATGAT	15893	GGTTACTTCTTTTTCAATATCAACTATGAA	10512			2	-5381	0.00438596
CACGCACACCAATTTAAGTTTATTGATGAT	15893	TTAAGTATTCTTTACGCGCGTTATCTGTCA	10076			1	-5817	0.00219298
CACGCACACCAATTTAAGTTTATTGATGAT	15893	TTTTGCCATATCCTCATGACCATTCTTTAA	9998			4	-5895	0.00877193
CACGCACACCAATTTAAGTTTATTGATGAT	15893	TCAATTCATTTTCATGTTCGGTAAATTTATA	9487			1	-6406	0.00219298
CACGCACACCAATTTAAGTTTATTGATGAT	15893	TTTTAAATTGTCATACTCTAGTAATTCGTC	9396			3	-6497	0.00657895
CACGCACACCAATTTAAGTTTATTGATGAT	15893	CATGGTCGAAGAAAAAGAAAAGTGAAATGGT	9041			1	-6852	0.00219298
CACGCACACCAATTTAAGTTTATTGATGAT	15893	AAATCATGGTCGAAGAAAAAGAAAAGTGAAA	9037			1	-6856	0.00219298
CACGCACACCAATTTAAGTTTATTGATGAT	15893	AGACAACGTAAATGAAGTTTATTCGCTCAC	8670			1	-7223	0.00219298
CACGCACACCAATTTAAGTTTATTGATGAT	15893	ATGACCTTAATATCTTCCGTGCCATCTTCT	8661			8	-7232	0.0175439
CACGCACACCAATTTAAGTTTATTGATGAT	15893	ATGACCTTAATATCTTCCGTGCCATCTTCT	8661	CGTATAGGTACAATGTTGACTGATGACTAT		2	-7232	0.00438596
CACGCACACCAATTTAAGTTTATTGATGAT	15893	TTCGGTGCTTTGTTCAATGTCATCCAGTAC	23151	CCATTGATTTAGCGCGTTGTAATGCTCTT		1	7258	0.00219298
CACGCACACCAATTTAAGTTTATTGATGAT	15893	GAAACACAATGCGAGAAAAGTAAGAGTAAT	8374			1	-7519	0.00219298
CACGCACACCAATTTAAGTTTATTGATGAT	15893	TTTGCAACCGTCTTTATACTCGTAACCATT	7826			1	-8067	0.00219298
CACGCACACCAATTTAAGTTTATTGATGAT	15893	TTCTTTAAACCCTTTAACCGCCATTTTAGCG	24009			1	8116	0.00219298
CACGCACACCAATTTAAGTTTATTGATGAT	15893	TTCTTTAAACCCTTTAACCGCCATTTTAGCG	24009	ACAATAAGAAATTTGCAAATCCTAGCATTA		1	8116	0.00219298
CACGCACACCAATTTAAGTTTATTGATGAT	15893	TTCTTTAAACCCTTTAACCGCCATTTTAGCG	24009	TTGTTTATCGATTGGAGCATGCAAATAACT		1	8116	0.00219298
CACGCACACCAATTTAAGTTTATTGATGAT	15893	TTGGAACGCATGAAGTACGACGAAAGTTAT	7610			1	-8283	0.00219298
CACGCACACCAATTTAAGTTTATTGATGAT	15893	ATTAAAGCAAGATGGAATCAAGATTTTAGGT	7433			1	-8460	0.00219298
CACGCACACCAATTTAAGTTTATTGATGAT	15893	ATTTCTTTATAGGGAATGGAATACACAGTC	7366			1	-8527	0.00219298
CACGCACACCAATTTAAGTTTATTGATGAT	15893	TTTAACTAATAATAACAATACTAATAATGA	7282			1	-8611	0.00219298
CACGCACACCAATTTAAGTTTATTGATGAT	15893	CTACTTCTGACGTGTATATTTGCCAATTGTC	7032			1	-8861	0.00219298
CACGCACACCAATTTAAGTTTATTGATGAT	15893	CGAACACATTGCCAAATATCTGACCAATCTT	24979			1	9086	0.00219298
CACGCACACCAATTTAAGTTTATTGATGAT	15893	AAAAGTTTCATTTAAAACCCCTAACCTTACT	6241			1	-9652	0.00219298
CACGCACACCAATTTAAGTTTATTGATGAT	15893	TTAATACAGGTTTTTACAAAAGCTTTACCAT	5960			1	-9933	0.00219298
CACGCACACCAATTTAAGTTTATTGATGAT	15893	TTTGATGATAAATACCACTTGCATGACTCG	5764			1	-10129	0.00219298
CACGCACACCAATTTAAGTTTATTGATGAT	15893	TTTGATGATAAATACCACTTGCATGACTCGT	5764			1	-10129	0.00219298
CACGCACACCAATTTAAGTTTATTGATGAT	15893	AATCAACTAGAAAATTATTACAAACAGAAT	5399			1	-10494	0.00219298
CACGCACACCAATTTAAGTTTATTGATGAT	15893	TCGCAATGTGTAGAGATATAGAACTTCACT	5354			1	-10539	0.00219298
CACGCACACCAATTTAAGTTTATTGATGAT	15893	TAACGACGGTACTTATTCCGTCGTTGCTAC	5208			2	-10685	0.00438596
CACGCACACCAATTTAAGTTTATTGATGAT	15893	AAAACAATTGATTGAATTAGTTACTCGATT	4836			2	-11057	0.00438596
CACGCACACCAATTTAAGTTTATTGATGAT	15893	AATTTGTTCTTGCGCTTCAATAGTGATAGTA	4368			1	-11525	0.00219298
CACGCACACCAATTTAAGTTTATTGATGAT	15893	AGCAGACTGTAACTTATATCATTCGTCATA	3588			4	-12305	0.00877193
CACGCACACCAATTTAAGTTTATTGATGAT	15893	TGTGTTCTCTTCAATCCATTCATCTATTGCT	3533			2	-12360	0.00438596
CACGCACACCAATTTAAGTTTATTGATGAT	15893	ATGAATGGATTGAAGAGAACACAGACGAAC	3510			1	-12383	0.00219298
CACGCACACCAATTTAAGTTTATTGATGAT	15893	TTTTCAAAGAATAAAAAAACTGCTACTTGT	3209			1	-12684	0.00219298
CACGCACACCAATTTAAGTTTATTGATGAT	15893	CGCTAAGACTGTGAAGCATAATACTGCTACT	3118			1	-12775	0.00219298
CACGCACACCAATTTAAGTTTATTGATGAT	15893	GCTAAGACTGTGAAGCATAATACTGCTACT	3117			2	-12776	0.00438596
CACGCACACCAATTTAAGTTTATTGATGAT	15893	CACTATACAAAACAACCCTCCTCATCACAA	2545			1	-13348	0.00219298
CACGCACACCAATTTAAGTTTATTGATGAT	15893	AAAGTATTGTTGTCCTTTACCTGTTACTTT	2487			2	-13406	0.00438596
CACGCACACCAATTTAAGTTTATTGATGAT	15893	GAATAACTCACGTTCCATTGAATACTGTGT	2397			2	-13496	0.00438596
CACGCACACCAATTTAAGTTTATTGATGAT	15893	CTCTGATGACGAATTAGCTATCATAACTTC	1335			1	-14558	0.00219298
CACGCACACCAATTTAAGTTTATTGATGAT	15893	GTTCAACGAATTCTTAAGTTGTCTTTCAGT	30474			1	14581	0.00219298
CACGCACACCAATTTAAGTTTATTGATGAT	15893	TCATGAAAAAGTGAATTGCTAGTAGTGTGT	1210			1	-14683	0.00219298
CACGCACACCAATTTAAGTTTATTGATGAT	15893	AGAATTGTTATTTAAACGACGTATCGATAT	30674			1	14781	0.00219298
CACGCACACCAATTTAAGTTTATTGATGAT	15893	GTAATAATATTTTTAATAACCTCAACATCT	1099			1	-14794	0.00219298
CACGCACACCAATTTAAGTTTATTGATGAT	15893	CCTCAACATCTTGGTCGTCGAGTTGTAGCT	1080			3	-14813	0.00657895
CACGCACACCAATTTAAGTTTATTGATGAT	15893	AATAATTCTGTTGATTTCGTGCCACTGTGC	1022			5	-14871	0.0109649
CACGCACACCAATTTAAGTTTATTGATGAT	15893	GGAATAAATTGAGTGATGTCTGTTGTTACC	30849			1	14956	0.00219298
CACGCACACCAATTTAAGTTTATTGATGAT	15893	GATACTTGAGGTGCAATGTTTTTTAAGAAT	30902			1	15009	0.00219298
CACGCACACCAATTTAAGTTTATTGATGAT	15893	TGATACACGGGAGAACAAAACCATCCTACC	797			8	-15096	0.0175439
CACGCACACCAATTTAAGTTTATTGATGAT	15893	TGATACACGGGAGAACAAAACCATCCTACC	797	TGATGACAGCTACAAGACAATGCCCTATGAG		1	-15096	0.00219298
CACGCACACCAATTTAAGTTTATTGATGAT	15893	CCATTTTAGATTTCAAAAGTTTAGTATCTAT	728			1	-15165	0.00219298
CACGCACACCAATTTAAGTTTATTGATGAT	15893	GCAACAATGGGAACCAAGCTATGTTGATAGA	406			1	-15487	0.00219298
CACGCACACCAATTTAAGTTTATTGATGAT	15893	ATAAATAAAAAAGTTACTACTCACACACTA	288			2	-15605	0.00438596
CACGCACACCAATTTAAGTTTATTGATGAT	15893	CACACACTAAGGCATACACACATAAGTTTAT	267			1	-15626	0.00219298
CACGCACACCAATTTAAGTTTATTGATGAT	15893	GTTGCCAGGGTGCCAAACTGCGATGTCTCC	34632			1	18739	0.00219298
CACGCACACCAATTTAAGTTTATTGATGAT	15893	AATTAAATCTTTCATACTACGCCAAATATT	35340			2	19447	0.00438596
CACGCACACCAATTTAAGTTTATTGATGAT	15893	ACCCCTAGACATTTGTCTATCCAGTGCTTGC	35613			1	19720	0.00219298
CACGCACACCAATTTAAGTTTATTGATGAT	15893	AAAAAATGATGGTGTTGACTTAGGTGACAT	36248			1	-20010	0.00219298
CACGCACACCAATTTAAGTTTATTGATGAT	15893	ACACTTTACTTAATTAAGGGGTGATTTTTA	37365			1	-18893	0.00219298
CACGCACACCAATTTAAGTTTATTGATGAT	15893	CAAGCAGAAAAATGGTTTGACAATTCATTA	38177			1	-18081	0.00219298
CACGCACACCAATTTAAGTTTATTGATGAT	15893	GCGTTCGTTTGTTCCGTTTCCTACTGCTCC	38765			2	-17493	0.00438596
CACGCACACCAATTTAAGTTTATTGATGAT	15893	TCCTGCATGTCTTAAATACTTAGCGATATT	38822			1	-17436	0.00219298
CACGCACACCAATTTAAGTTTATTGATGAT	15893	GTGCGATTCATGGTAAGCCTATAGGTGGTT	39237			1	-17021	0.00219298
CACGCACACCAATTTAAGTTTATTGATGAT	15893	GCTTTTATGTTATAATTGCTTTTATATAGT	39964			1	-16294	0.00219298
CACGCACACCAATTTAAGTTTATTGATGAT	15893					307		0.673246

## Sheet: W
Colony W
Spacer 1	position	spacer2	position	spacer3	spacer4	# reads	spc1 to spc2 distance	fraction reads
GTGCGATTCATGGTAAGCCTATAGGTGGTT	39238	GAAACGACGTTAAAGGTAGACCCTAATATT	35286			1	-3952	0.000239177
GTGCGATTCATGGTAAGCCTATAGGTGGTT	39238	ATTAGGGTGACGCGGGTCATCAAAATTGGT	35166			1	-4072	0.000239177
GTGCGATTCATGGTAAGCCTATAGGTGGTT	39238	GTGTGTCCGTCCGAACCTATTCCGTTGCCA	34655			1	-4583	0.000239177
GTGCGATTCATGGTAAGCCTATAGGTGGTT	39238	TCGCAATGTGTAGAGATATAGAACTTCACTG	5354			1	6481	0.000239177
GTGCGATTCATGGTAAGCCTATAGGTGGTT	39238	GTTCGATAGTAATTTAAGTGCTAAAGCTAA	6940			1	8067	0.000239177
GTGCGATTCATGGTAAGCCTATAGGTGGTT	39238	ACTACTTCTGACGTGTATATTTGCCAATTGTC	7033			1	8160	0.000239177
GTGCGATTCATGGTAAGCCTATAGGTGGTT	39238	TTTAACTAATAATAACAATACTAATAATGA	7282			2	8409	0.000478354
GTGCGATTCATGGTAAGCCTATAGGTGGTT	39238	ATTAAAGTGGGTCAGTTGTATGAAAATATAA	12587			1	13714	0.000239177
GTGCGATTCATGGTAAGCCTATAGGTGGTT	39238	CCGATAACACCGATAATTTGAGCGACTGCT	25304			1	-13934	0.000239177
GTGCGATTCATGGTAAGCCTATAGGTGGTT	39238	ACAATTATTAATTGAACAAGCGCAAGCTAA	23375			1	-15863	0.000239177
GTGCGATTCATGGTAAGCCTATAGGTGGTT	39238	TTAATCGTTCAGGTTTAGTATGTGTGTATA	16253			3492	17380	0.835207
GTGCGATTCATGGTAAGCCTATAGGTGGTT	39238	TTAATCGTTCAGGTTTAGTATGTGTGTATA	16253	AAATATTGTCGCCAACAAAAATAACATTAT		2	17380	0.000478354
GTGCGATTCATGGTAAGCCTATAGGTGGTT	39238	TTAATCGTTCAGGTTTAGTATGTGTGTATA	16253	AAGTTCCCAAGTTTTAGAGAATGTTTCTAC		1	17380	0.000239177
GTGCGATTCATGGTAAGCCTATAGGTGGTT	39238	TTAATCGTTCAGGTTTAGTATGTGTGTATA	16253	ACAATAAGAAATTTGCAAATCCTAGCATTA		1	17380	0.000239177
GTGCGATTCATGGTAAGCCTATAGGTGGTT	39238	TTAATCGTTCAGGTTTAGTATGTGTGTATA	16253	ATATTCATCAGATTCCAATAATACGTTAAT		1	17380	0.000239177
GTGCGATTCATGGTAAGCCTATAGGTGGTT	39238	TTAATCGTTCAGGTTTAGTATGTGTGTATA	16253	ATATTCATCAGATTCCAATACTACGTTAAT		2	17380	0.000478354
GTGCGATTCATGGTAAGCCTATAGGTGGTT	39238	TTAATCGTTCAGGTTTAGTATGTGTGTATA	16253	ATTACGAAAGCGTGGACGAGGCGAGCCCAT		2	17380	0.000478354
GTGCGATTCATGGTAAGCCTATAGGTGGTT	39238	TTAATCGTTCAGGTTTAGTATGTGTGTATA	16253	ATTAGGGTGACGCGGGTCATCAAAATTGGT		1	17380	0.000239177
GTGCGATTCATGGTAAGCCTATAGGTGGTT	39238	TTAATCGTTCAGGTTTAGTATGTGTGTATA	16253	ATTTGTTCTTGCGCTTCAATAGTGATAGTA		1	17380	0.000239177
GTGCGATTCATGGTAAGCCTATAGGTGGTT	39238	TTAATCGTTCAGGTTTAGTATGTGTGTATA	16253	CATCTATCCTTGTTCACCCAAGCATGTCAC		1	17380	0.000239177
GTGCGATTCATGGTAAGCCTATAGGTGGTT	39238	TTAATCGTTCAGGTTTAGTATGTGTGTATA	16253	CGGATTAATTACAAGTTTACATTCAATGAC		1	17380	0.000239177
GTGCGATTCATGGTAAGCCTATAGGTGGTT	39238	TTAATCGTTCAGGTTTAGTATGTGTGTATA	16253	CGTGTAATATGCGGAAAGCCTCACGCAGACA		1	17380	0.000239177
GTGCGATTCATGGTAAGCCTATAGGTGGTT	39238	TTAATCGTTCAGGTTTAGTATGTGTGTATA	16253	CGTGTAATATGCGGAAAGCCTCACGCAGACC		7	17380	0.00167424
GTGCGATTCATGGTAAGCCTATAGGTGGTT	39238	TTAATCGTTCAGGTTTAGTATGTGTGTATA	16253	CGTGTAATATGCGGAAAGCTTCACGCAGACC		1	17380	0.000239177
GTGCGATTCATGGTAAGCCTATAGGTGGTT	39238	TTAATCGTTCAGGTTTAGTATGTGTGTATA	16253	CGTGTAATTTGCGGAAAGCATCGCGCAGACC		1	17380	0.000239177
GTGCGATTCATGGTAAGCCTATAGGTGGTT	39238	TTAATCGTTCAGGTTTAGTATGTGTGTATA	16253	CTAAAAACAAAAAAAATCCACCAGTGCCAGCG		1	17380	0.000239177
GTGCGATTCATGGTAAGCCTATAGGTGGTT	39238	TTAATCGTTCAGGTTTAGTATGTGTGTATA	16253	CTAGATACGGTGCATATAATTACTTCGGTAT		1	17380	0.000239177
GTGCGATTCATGGTAAGCCTATAGGTGGTT	39238	TTAATCGTTCAGGTTTAGTATGTGTGTATA	16253	GAACTAGGAAGAAAAATCGCCATCAATTCA		1	17380	0.000239177
GTGCGATTCATGGTAAGCCTATAGGTGGTT	39238	TTAATCGTTCAGGTTTAGTATGTGTGTATA	16253	GATTAGCCATCATATCTCCTCGTATTTAGT		1	17380	0.000239177
GTGCGATTCATGGTAAGCCTATAGGTGGTT	39238	TTAATCGTTCAGGTTTAGTATGTGTGTATA	16253	GGAACCTGGAGACATCGCAGTTTGGCACCC		1	17380	0.000239177
GTGCGATTCATGGTAAGCCTATAGGTGGTT	39238	TTAATCGTTCAGGTTTAGTATGTGTGTATA	16253	GGAGTAACTAATATCTGAATTGTTATCAGT		1	17380	0.000239177
GTGCGATTCATGGTAAGCCTATAGGTGGTT	39238	TTAATCGTTCAGGTTTAGTATGTGTGTATA	16253	GGCGTTGTTAGAAGCCTTAAACGCACCTTA		2	17380	0.000478354
GTGCGATTCATGGTAAGCCTATAGGTGGTT	39238	TTAATCGTTCAGGTTTAGTATGTGTGTATA	16253	GGCGTTTGGATTGAGTATTGCGAATCAAGT		1	17380	0.000239177
GTGCGATTCATGGTAAGCCTATAGGTGGTT	39238	TTAATCGTTCAGGTTTAGTATGTGTGTATA	16253	GGTGTTTGACGAGATTAAGTCACGTTGTAG		1	17380	0.000239177
GTGCGATTCATGGTAAGCCTATAGGTGGTT	39238	TTAATCGTTCAGGTTTAGTATGTGTGTATA	16253	TAAAATGGCAGCAGTTTGCGGATATGGTGCT		1	17380	0.000239177
GTGCGATTCATGGTAAGCCTATAGGTGGTT	39238	TTAATCGTTCAGGTTTAGTATGTGTGTATA	16253	TAGGTTAAACTTCCCTAACAACTTAAGCGTT		1	17380	0.000239177
GTGCGATTCATGGTAAGCCTATAGGTGGTT	39238	TTAATCGTTCAGGTTTAGTATGTGTGTATA	16253	TCAGATATTTGGCAATGTGTTCGCTGGTAT		1	17380	0.000239177
GTGCGATTCATGGTAAGCCTATAGGTGGTT	39238	TTAATCGTTCAGGTTTAGTATGTGTGTATA	16253	TCGCAATGTGTAGAGATATAGAACTTCACTG		3	17380	0.000717532
GTGCGATTCATGGTAAGCCTATAGGTGGTT	39238	TTAATCGTTCAGGTTTAGTATGTGTGTATA	16253	TCTTTCAACAACCAATGCTCGGGATGGTCA		1	17380	0.000239177
GTGCGATTCATGGTAAGCCTATAGGTGGTT	39238	TTAATCGTTCAGGTTTAGTATGTGTGTATA	16253	TGATATTGATTTACTTGTACTAGATGATATG		1	17380	0.000239177
GTGCGATTCATGGTAAGCCTATAGGTGGTT	39238	TTAATCGTTCAGGTTTAGTATGTGTGTATA	16253	TGCACCGTCATACGTAATTGTTGTGTTGTT		1	17380	0.000239177
GTGCGATTCATGGTAAGCCTATAGGTGGTT	39238	TTAATCGTTCAGGTTTAGTATGTGTGTATA	16253	TTAATCGTTCAGGTTTAGTATGTGTGTATA		1	17380	0.000239177
GTGCGATTCATGGTAAGCCTATAGGTGGTT	39238	TTAATCGTTCAGGTTTAGTATGTGTGTATA	16253	TTACGAGGTGTCACACCTCTTATTTGTCCT		1	17380	0.000239177
GTGCGATTCATGGTAAGCCTATAGGTGGTT	39238	TTAATCGTTCAGGTTTAGTATGTGTGTATA	16253	TTATTAATCTGTACATACTGACAATTCGTT		1	17380	0.000239177
GTGCGATTCATGGTAAGCCTATAGGTGGTT	39238	TTAATCGTTCAGGTTTAGTATGTGTGTATA	16253	TTTCAAACAACTTATCAAATACCGTGTCTT		1	17380	0.000239177
GTGCGATTCATGGTAAGCCTATAGGTGGTT	39238	TTAATCGTTCAGGTTTAGTATGTGTGTATA	16253	TTTTAAATTGTCATACTCTAGTAATTCGTC		1	17380	0.000239177
GTGCGATTCATGGTAAGCCTATAGGTGGTT	39238	TTAATCGTTCAGGTTTAGTATGTGTGTATA	16253	TTTTCGCCGAATTTTTCGTATTCAACTGT		1	17380	0.000239177
GTGCGATTCATGGTAAGCCTATAGGTGGTT	39238	GATCGTTATCATTCGAAAGGATTAGAATCA	19073			1	-20165	0.000239177
GTGCGATTCATGGTAAGCCTATAGGTGGTT	39238					629		0.150442

## Sheet: V
Colony V
Spacer 1	position	spacer2	position	spacer3	spacer4	# reads	spc1 to spc2 distance	fraction reads
CGAACTGAAAACTAACAAAACAAATACTGAG	33658	TTACTATGCAACAAGAGTGCCGGATTTACC	32791			1	-867	0.000451875
CGAACTGAAAACTAACAAAACAAATACTGAG	33658	GTTTTTCGTCTGATGGAGTAGGGCCTCGTG	35545			1	1887	0.000451875
CGAACTGAAAACTAACAAAACAAATACTGAG	33658	GCCTATTTTTTTATGTTATAGCTAGCCTTC	39765			1	6107	0.000451875
CGAACTGAAAACTAACAAAACAAATACTGAG	33658	ATGAATGGATTGAAGAGAACACAGACGAAC	3510			1131	10217	0.511071
CGAACTGAAAACTAACAAAACAAATACTGAG	33658	ATGAATGGATTGAAGAGAACACAGACGAAC	3510	AATTCCTTATTATGTTGGTCCATTGGCGCGT		1	10217	0.000451875
CGAACTGAAAACTAACAAAACAAATACTGAG	33658	ATGAATGGATTGAAGAGAACACAGACGAAC	3510	ATTTCAATATCGCCGTATGTGTAATGTGC		1	10217	0.000451875
CGAACTGAAAACTAACAAAACAAATACTGAG	33658	ATGAATGGATTGAAGAGAACACAGACGAAC	3510	TAAAAGACGCGCGTATTGATAATACAGGTTA		1	10217	0.000451875
CGAACTGAAAACTAACAAAACAAATACTGAG	33658	ATGAATGGATTGAAGAGAACACAGACGAAC	3510	TTACTATGCAACAAGAGTGCCGGATTTACC		1	10217	0.000451875
CGAACTGAAAACTAACAAAACAAATACTGAG	33658	TTAGCTATTGGTAAGTCGTAAGGTACATAT	21170	ATTTCAATATCGCCGTATGTGTAATGTGC		1	-12488	0.000451875
CGAACTGAAAACTAACAAAACAAATACTGAG	33658	ACCAAAATCATTAATATTGCAAGGTTCATA	8008			2	14715	0.000903751
CGAACTGAAAACTAACAAAACAAATACTGAG	33658	ATTTCAATATCGCCGTATGTGTAATGTGC	9877			1	16584	0.000451875
CGAACTGAAAACTAACAAAACAAATACTGAG	33658	AAATATTGTCGCCAACAAAAATAACATTAT	16783			1	-16875	0.000451875
CGAACTGAAAACTAACAAAACAAATACTGAG	33658	TATGATGGCTAATATGAATGAACATGAATTA	13164			683	19871	0.308631
CGAACTGAAAACTAACAAAACAAATACTGAG	33658	TATGATGGCTAATATGAATGAACATGAATTA	13164	ATGACCTTAATATCTTCCGTGCCATCTTCT		2	19871	0.000903751
CGAACTGAAAACTAACAAAACAAATACTGAG	33658	TATGATGGCTAATATGAATGAACATGAATTA	13164	CATATTCATCAGATTCCAATACTACGTTAAT		1	19871	0.000451875
CGAACTGAAAACTAACAAAACAAATACTGAG	33658	TATGATGGCTAATATGAATGAACATGAATTA	13164	TAAATAAACTTTTCAGCATTGTTGATAACA		1	19871	0.000451875
CGAACTGAAAACTAACAAAACAAATACTGAG	33658	TATGATGGCTAATATGAATGAACATGAATTA	13164	TAGGTTAAACTTCCCTAACAACTTAAGCGT		1	19871	0.000451875
CGAACTGAAAACTAACAAAACAAATACTGAG	33658					382		0.172616

## Sheet: U
Colony U
Spacer 1	position	spacer2	position	spacer3	spacer4	# reads	spc1 to spc2 distance	fraction reads
ATAAAAAGAAAAACGAAGGAGTGTATTAAA	22101	TGGCAAAAGTTAAGTACGGTGCTGATAGCA	21278			4	-823	0.00105457
ATAAAAAGAAAAACGAAGGAGTGTATTAAA	22101	CATTTCTTTGTCCTCGCTTTTGGCCATATT	23179			1	1078	0.000263644
ATAAAAAGAAAAACGAAGGAGTGTATTAAA	22101	TAACGTGCGTAATCCCAATCACCCATTAGT	20243			3	-1858	0.000790931
ATAAAAAGAAAAACGAAGGAGTGTATTAAA	22101	GATCGTTATCATTCGAAAGGATTAGAATCA	19073			1	-3028	0.000263644
ATAAAAAGAAAAACGAAGGAGTGTATTAAA	22101	ATTTAATGACAAATTACCTGACATAGATGA	17615			185	-4486	0.0487741
ATAAAAAGAAAAACGAAGGAGTGTATTAAA	22101	ATTTAATGACAAATTACCTGACATAGATGA	17615	ACACGAGCGTCCAAAAACACTGTTGTATCA		1	-4486	0.000263644
ATAAAAAGAAAAACGAAGGAGTGTATTAAA	22101	ATTTAATGACAAATTACCTGACATAGATGA	17615	CCATTTTGCTGTTGATTCTTCTATGCTATC		3	-4486	0.000790931
ATAAAAAGAAAAACGAAGGAGTGTATTAAA	22101	ATTTAATGACAAATTACCTGACATAGATGA	17615	CCATTTTGCTGTTGATTCTTCTATTCTATC		1	-4486	0.000263644
ATAAAAAGAAAAACGAAGGAGTGTATTAAA	22101	ATTTAATGACAAATTACCTGACATAGATGA	17615	CTTCGTTAAAAAAAATATCTCTTCCTTCTTG		1	-4486	0.000263644
ATAAAAAGAAAAACGAAGGAGTGTATTAAA	22101	ATTTAATGACAAATTACCTGACATAGATGA	17615	GTAGTAGTATGATGCCGAAATATCGAGTGT		1	-4486	0.000263644
ATAAAAAGAAAAACGAAGGAGTGTATTAAA	22101	ATTTAATGACAAATTACCTGACATAGATGA	17615	TCGTGTTACAAAGATTCCGTGGAGTTTTAA		1	-4486	0.000263644
ATAAAAAGAAAAACGAAGGAGTGTATTAAA	22101	ACTGGAATGTTACGAGTGAACTTAAATATC	17483			1	-4618	0.000263644
ATAAAAAGAAAAACGAAGGAGTGTATTAAA	22101	CACCAGTTTCAAAATCTTCTTTTTCTTCAAT	16459			5	-5642	0.00131822
ATAAAAAGAAAAACGAAGGAGTGTATTAAA	22101	ATCAAATTCTTTTATAGGCTCTCCGTTTGT	16195			3	-5906	0.000790931
ATAAAAAGAAAAACGAAGGAGTGTATTAAA	22101	TTTTGATGGACAACAGACTTTTGCAGAAGC	28328			1	6227	0.000263644
ATAAAAAGAAAAACGAAGGAGTGTATTAAA	22101	GAATGTAGCTAAGAATGACATTGAAATAGA	14804			1	-7297	0.000263644
ATAAAAAGAAAAACGAAGGAGTGTATTAAA	22101	ACGACAGATATACGTCAGCGATTTATAATC	30373			1	8272	0.000263644
ATAAAAAGAAAAACGAAGGAGTGTATTAAA	22101	AGACTGATCGCTCAACTTTGCGAAGTCACT	13774			1	-8327	0.000263644
ATAAAAAGAAAAACGAAGGAGTGTATTAAA	22101	TATGATGGCTAATATGAATGAACATGAATTA	13164			1	-8937	0.000263644
ATAAAAAGAAAAACGAAGGAGTGTATTAAA	22101	TTCTAATTCGCCATTCATGTTCGTGCCGTT	33963	TTAGCTATTGGTAAGTCGTAAGGTACATAT		1	11862	0.000263644
ATAAAAAGAAAAACGAAGGAGTGTATTAAA	22101	AATGCTTAGCACTCTCAATGAGATTAAATT	33985			7	11884	0.0018455
ATAAAAAGAAAAACGAAGGAGTGTATTAAA	22101	AATTTCAATATCGCCGTATGTGTAATGTGC	9878			1	-12223	0.000263644
ATAAAAAGAAAAACGAAGGAGTGTATTAAA	22101	TTTAAATTGTCATACTCTAGTAATTCGTC	9395			1	-12706	0.000263644
ATAAAAAGAAAAACGAAGGAGTGTATTAAA	22101	GTAACCCGAAAAAATCTCATACATGGGGCT	35611			2	13510	0.000527287
ATAAAAAGAAAAACGAAGGAGTGTATTAAA	22101	CATGGCTTAACACCTAGATTACATTTGTTTA	36366			5	14265	0.00131822
ATAAAAAGAAAAACGAAGGAGTGTATTAAA	22101	CATGGCTTAACACCTAGATTACATTTGTTTA	36366	AAAATGTTTTAACACCTATTAACGTAGTAT		4	14265	0.00105457
ATAAAAAGAAAAACGAAGGAGTGTATTAAA	22101	TTAACTAATAATAACAATACTAATAATGA	7283			1	-14818	0.000263644
ATAAAAAGAAAAACGAAGGAGTGTATTAAA	22101	TTTAACTAATAATAACAATACTAATAATG	7282			1	-14819	0.000263644
ATAAAAAGAAAAACGAAGGAGTGTATTAAA	22101	TTTAACTAATAATAACAATACTAATAATGA	7282			1020	-14819	0.268916
ATAAAAAGAAAAACGAAGGAGTGTATTAAA	22101	TTTAACTAATAATAACAATACTAATAATGA	7282	AACATAACCAGCGTGTTTGATAACCTTTTT		2	-14819	0.000527287
ATAAAAAGAAAAACGAAGGAGTGTATTAAA	22101	TTTAACTAATAATAACAATACTAATAATGA	7282	AGACTTTCCTTCTATTATATCAATAAAGGTA		1	-14819	0.000263644
ATAAAAAGAAAAACGAAGGAGTGTATTAAA	22101	TTTAACTAATAATAACAATACTAATAATGA	7282	ATACGACGAATTCCCTCACACTATTTCTAT		1	-14819	0.000263644
ATAAAAAGAAAAACGAAGGAGTGTATTAAA	22101	TTTAACTAATAATAACAATACTAATAATGA	7282	ATCACGCATTGATGACATGAACGCTATAGA		2	-14819	0.000527287
ATAAAAAGAAAAACGAAGGAGTGTATTAAA	22101	TTTAACTAATAATAACAATACTAATAATGA	7282	ATTCTCATCTACGACATAAGCATGTTTAAT		1	-14819	0.000263644
ATAAAAAGAAAAACGAAGGAGTGTATTAAA	22101	TTTAACTAATAATAACAATACTAATAATGA	7282	CAAAGCATTATATAACTCTCTTGCACTTATTG		1	-14819	0.000263644
ATAAAAAGAAAAACGAAGGAGTGTATTAAA	22101	TTTAACTAATAATAACAATACTAATAATGA	7282	CTAATTCATGTTCATTCATATTAGCCATCAT		1	-14819	0.000263644
ATAAAAAGAAAAACGAAGGAGTGTATTAAA	22101	TTTAACTAATAATAACAATACTAATAATGA	7282	CTCATATCATCGTTTAAGATATAGAATGCTT		1	-14819	0.000263644
ATAAAAAGAAAAACGAAGGAGTGTATTAAA	22101	TTTAACTAATAATAACAATACTAATAATGA	7282	CTCCAACTACCTCCCCTTGCTTAACCCCATAT		1	-14819	0.000263644
ATAAAAAGAAAAACGAAGGAGTGTATTAAA	22101	TTTAACTAATAATAACAATACTAATAATGA	7282	CTTCGTTAAAAAAAATATCTCTTCCTTCTTG		2	-14819	0.000527287
ATAAAAAGAAAAACGAAGGAGTGTATTAAA	22101	TTTAACTAATAATAACAATACTAATAATGA	7282	CTTCGTTAAAAAAATGTCTCTTCCTTCTTG		1	-14819	0.000263644
ATAAAAAGAAAAACGAAGGAGTGTATTAAA	22101	TTTAACTAATAATAACAATACTAATAATGA	7282	GACATTCAAAAAGCACAAGTGTCTGGACAA		1	-14819	0.000263644
ATAAAAAGAAAAACGAAGGAGTGTATTAAA	22101	TTTAACTAATAATAACAATACTAATAATGA	7282	GTATAGCAAAGAGTCAATTGTTAATATGAT		1	-14819	0.000263644
ATAAAAAGAAAAACGAAGGAGTGTATTAAA	22101	TTTAACTAATAATAACAATACTAATAATGA	7282	TAGATTTGAAACTAAGTAACACTGAATTAA		1	-14819	0.000263644
ATAAAAAGAAAAACGAAGGAGTGTATTAAA	22101	TGTTCACAGAATACAAAAAAGAGCTGAAAA	7099			3	-15002	0.000790931
ATAAAAAGAAAAACGAAGGAGTGTATTAAA	22101	TGTTCACAGAATACAAAAAAGAGCTGAAAA	7099	TAAATACAAAAATGCCCCTACATCTTGTGC		1	-15002	0.000263644
ATAAAAAGAAAAACGAAGGAGTGTATTAAA	22101	TTTTTATTTTGGAAAAAAGGAGCAAACAAA	37816			19	15715	0.00500923
ATAAAAAGAAAAACGAAGGAGTGTATTAAA	22101	TTTTTATTTTGGAAAAAAGGAGCAAACAAA	37816	AAATTTTTTGTCCTAGATTTTGGCCATATT		1	15715	0.000263644
ATAAAAAGAAAAACGAAGGAGTGTATTAAA	22101	TTTTTATTTTGGAAAAAAGGAGCAAACAAA	37816	AGATTATGGCAGAGAACTTGTATTGAACAA		1	15715	0.000263644
ATAAAAAGAAAAACGAAGGAGTGTATTAAA	22101	TTTTTATTTTGGAAAAAAGGAGCAAACAAA	37816	CATTTCTTTGTCCTCGCTTTTGGCCATATT		1	15715	0.000263644
ATAAAAAGAAAAACGAAGGAGTGTATTAAA	22101	TTTTTATTTTGGAAAAAAGGAGCAAACAAA	37816	CTATTACTTCTCAAAGTGATGTGTTAGCTA		1	15715	0.000263644
ATAAAAAGAAAAACGAAGGAGTGTATTAAA	22101	ACACAACCTAGAAACAATAAGTAAACTTTC	6104			61	-15997	0.0160823
ATAAAAAGAAAAACGAAGGAGTGTATTAAA	22101	CATATTCGTAGGTGTCATTACTTCTTTAAT	38124			5	16023	0.00131822
ATAAAAAGAAAAACGAAGGAGTGTATTAAA	22101	GTGCGATTCATGGTAAGCCTATAGGTGGTT	39237	TTATTCGTTCAGGTTTAGTATGTTTGTATA		1	17136	0.000263644
ATAAAAAGAAAAACGAAGGAGTGTATTAAA	22101	TCTAATTGCTTCTACTACGTCCGTAATGCT	4575			5	-17526	0.00131822
ATAAAAAGAAAAACGAAGGAGTGTATTAAA	22101	GCCTATTTTTTTATGTTATAGCTAGCCTTC	39765			613	17664	0.161613
ATAAAAAGAAAAACGAAGGAGTGTATTAAA	22101	GCCTATTTTTTTATGTTATAGCTAGCCTTC	39765	AAAAAATTTACTTACTTAGCAATAGGTGT		1	17664	0.000263644
ATAAAAAGAAAAACGAAGGAGTGTATTAAA	22101	GCCTATTTTTTTATGTTATAGCTAGCCTTC	39765	AATATTGTCGCCAACAAAAATAACATTATAG		1	17664	0.000263644
ATAAAAAGAAAAACGAAGGAGTGTATTAAA	22101	GCCTATTTTTTTATGTTATAGCTAGCCTTC	39765	ACATGCAGGACATGAAGTTGCATTATACGG		1	17664	0.000263644
ATAAAAAGAAAAACGAAGGAGTGTATTAAA	22101	GCCTATTTTTTTATGTTATAGCTAGCCTTC	39765	ACGGTACTGGTATATATGCTACTGGTCCTGG		1	17664	0.000263644
ATAAAAAGAAAAACGAAGGAGTGTATTAAA	22101	GCCTATTTTTTTATGTTATAGCTAGCCTTC	39765	ATTGAAAAAGATACGTATGCACATTACACA		1	17664	0.000263644
ATAAAAAGAAAAACGAAGGAGTGTATTAAA	22101	GCCTATTTTTTTATGTTATAGCTAGCCTTC	39765	CAGTATTTTTCATAGAGGTGGTTAAATATGT		1	17664	0.000263644
ATAAAAAGAAAAACGAAGGAGTGTATTAAA	22101	GCCTATTTTTTTATGTTATAGCTAGCCTTC	39765	CATTTCTTTGTCCTCGCTTTTGGCCATATT		1	17664	0.000263644
ATAAAAAGAAAAACGAAGGAGTGTATTAAA	22101	GCCTATTTTTTTATGTTATAGCTAGCCTTC	39765	CGACATAACGCTAATACATGTTTGTCATAG		1	17664	0.000263644
ATAAAAAGAAAAACGAAGGAGTGTATTAAA	22101	GCCTATTTTTTTATGTTATAGCTAGCCTTC	39765	CGGTATAATGAGGGTTTCGCAAACTAATTT		1	17664	0.000263644
ATAAAAAGAAAAACGAAGGAGTGTATTAAA	22101	GCCTATTTTTTTATGTTATAGCTAGCCTTC	39765	CTTCAGCATCTCCTATCATCTCTTTGTTGTT		1	17664	0.000263644
ATAAAAAGAAAAACGAAGGAGTGTATTAAA	22101	GCCTATTTTTTTATGTTATAGCTAGCCTTC	39765	GACATTCAAAAACCACAAGTGTCTGGACAA		1	17664	0.000263644
ATAAAAAGAAAAACGAAGGAGTGTATTAAA	22101	GCCTATTTTTTTATGTTATAGCTAGCCTTC	39765	GACATTCAAAAAGCACAAGTGTCTGGACAA		3	17664	0.000790931
ATAAAAAGAAAAACGAAGGAGTGTATTAAA	22101	GCCTATTTTTTTATGTTATAGCTAGCCTTC	39765	TTCGCAATGTGTAGAGATATAGAACTTCAC		1	17664	0.000263644
ATAAAAAGAAAAACGAAGGAGTGTATTAAA	22101	ATTTGTTCTTGCGCTTCAATAGTGATAGTA	4367			1	-17734	0.000263644
ATAAAAAGAAAAACGAAGGAGTGTATTAAA	22101	GCAGATTATTTGAAAAAGGGCAAACGCTTGT	40228			1	18127	0.000263644
ATAAAAAGAAAAACGAAGGAGTGTATTAAA	22101	TGTGAATATAAACCCTCTATCAACATAGCT	360			6	18624	0.00158186
ATAAAAAGAAAAACGAAGGAGTGTATTAAA	22101	CTTCGTTAAAAAAAATATCTCTTCCTTCTTG	899			1001	19163	0.263907
ATAAAAAGAAAAACGAAGGAGTGTATTAAA	22101	CTTCGTTAAAAAAAATATCTCTTCCTTCTTG	899	AAAAGACGCGCGTATTGATAATACAGGTTAT		1	19163	0.000263644
ATAAAAAGAAAAACGAAGGAGTGTATTAAA	22101	CTTCGTTAAAAAAAATATCTCTTCCTTCTTG	899	AAAGTTTCATCCGTTTAAATCAATAAGGTAG		1	19163	0.000263644
ATAAAAAGAAAAACGAAGGAGTGTATTAAA	22101	CTTCGTTAAAAAAAATATCTCTTCCTTCTTG	899	ACGAAAGCGTCTTTATCTCTTGTAGCAAACG		1	19163	0.000263644
ATAAAAAGAAAAACGAAGGAGTGTATTAAA	22101	CTTCGTTAAAAAAAATATCTCTTCCTTCTTG	899	ACGCCCCTTTGATCTATTAGTTTACATAGAA		1	19163	0.000263644
ATAAAAAGAAAAACGAAGGAGTGTATTAAA	22101	CTTCGTTAAAAAAAATATCTCTTCCTTCTTG	899	AGTACCTGCAATAATGGCAGTACTTAATGC		1	19163	0.000263644
ATAAAAAGAAAAACGAAGGAGTGTATTAAA	22101	CTTCGTTAAAAAAAATATCTCTTCCTTCTTG	899	ATGAATGGATTGAAGAGAACACAGACGAAC		1	19163	0.000263644
ATAAAAAGAAAAACGAAGGAGTGTATTAAA	22101	CTTCGTTAAAAAAAATATCTCTTCCTTCTTG	899	ATGACCTTAATATCTTCCGTGCCATCTTCT		1	19163	0.000263644
ATAAAAAGAAAAACGAAGGAGTGTATTAAA	22101	CTTCGTTAAAAAAAATATCTCTTCCTTCTTG	899	ATGGAAGTTGACGGAATACTAGAAGATGTT		1	19163	0.000263644
ATAAAAAGAAAAACGAAGGAGTGTATTAAA	22101	CTTCGTTAAAAAAAATATCTCTTCCTTCTTG	899	CATATTCGTAGGTGTCATTACTTCTTTAAT		25	19163	0.00659109
ATAAAAAGAAAAACGAAGGAGTGTATTAAA	22101	CTTCGTTAAAAAAAATATCTCTTCCTTCTTG	899	CATATTCGTAGGTGTTATTACTTCTTTAAT		1	19163	0.000263644
ATAAAAAGAAAAACGAAGGAGTGTATTAAA	22101	CTTCGTTAAAAAAAATATCTCTTCCTTCTTG	899	CATATTGGTAGGTGTCATTACTTCTTTAAT		1	19163	0.000263644
ATAAAAAGAAAAACGAAGGAGTGTATTAAA	22101	CTTCGTTAAAAAAAATATCTCTTCCTTCTTG	899	CCAATACTTCATCACGATGTTTTTGTAGTGT		1	19163	0.000263644
ATAAAAAGAAAAACGAAGGAGTGTATTAAA	22101	CTTCGTTAAAAAAAATATCTCTTCCTTCTTG	899	CCAATACTTCGTCACGATGTTTTTGTAGTGT		1	19163	0.000263644
ATAAAAAGAAAAACGAAGGAGTGTATTAAA	22101	CTTCGTTAAAAAAAATATCTCTTCCTTCTTG	899	TCAACAAGCGGTTTACCACTAGTTGAAGTG		1	19163	0.000263644
ATAAAAAGAAAAACGAAGGAGTGTATTAAA	22101	CTTCGTTAAAAAAAATATCTCTTCCTTCTTG	899	TGGTAAATTAACATTCTTCCGTGTGTATTCA		1	19163	0.000263644
ATAAAAAGAAAAACGAAGGAGTGTATTAAA	22101	CTTCGTTAAAAAAAATATCTCTTCCTTCTTG	899	TTGACCTTAATAGCTTCCGTGCCATTTTCT		1	19163	0.000263644
ATAAAAAGAAAAACGAAGGAGTGTATTAAA	22101	CTTCGTTAAAAAAAATATCTCTTCCTTCTTG	899	TTTAACTAATAATAACAATACTAATAATGA		2	19163	0.000527287
ATAAAAAGAAAAACGAAGGAGTGTATTAAA	22101	CTTCGTTAAAAAAAATATCTCTTCCTTCTTG	899	TTTATCTAATAGCATCATCTA		1	19163	0.000263644
ATAAAAAGAAAAACGAAGGAGTGTATTAAA	22101	GAAAGTTTTAACTTAAGGAGGAACAACAAA	912			1	19176	0.000263644
ATAAAAAGAAAAACGAAGGAGTGTATTAAA	22101	AAAATGTTTTAACACCTATTAACGTAGTAT	1478			1	19742	0.000263644
ATAAAAAGAAAAACGAAGGAGTGTATTAAA	22101					736		0.194042

## Sheet: C
Colony C
Spacer 1	position	spacer2	position	spacer3	spacer4	# reads	spc1 to spc2 distance	fraction reads
GAATACCCTGCGTCAATATATGCTTTCCGT	14648	TTTAGCCACTCATATTCTTCAAAGGCCTTT	14804			2	156	0.000490677
GAATACCCTGCGTCAATATATGCTTTCCGT	14648	TTTATTGAACGTAGCTCCTGCACAAGATGT	14460			1	-188	0.000245339
GAATACCCTGCGTCAATATATGCTTTCCGT	14648	GACAGCTGATGCATTCCTCGCTAGTTTAGA	14849			1	201	0.000245339
GAATACCCTGCGTCAATATATGCTTTCCGT	14648	AATTGATTTGTAAGAATTATCTTAAGACGT	14274			1	-374	0.000245339
GAATACCCTGCGTCAATATATGCTTTCCGT	14648	AGTAGATAAATCTTTTCTGCTAATTCATCA	14199			1	-449	0.000245339
GAATACCCTGCGTCAATATATGCTTTCCGT	14648	AAAACAAGATTGGTTTATGTTAATTAATCA	15102			1	454	0.000245339
GAATACCCTGCGTCAATATATGCTTTCCGT	14648	TATGTTAATTAATCACGGAGCAAAGCGTAC	15117			1	469	0.000245339
GAATACCCTGCGTCAATATATGCTTTCCGT	14648	TCAACAACCAATGCTCGGGATGGTCAGGGT	15554			1	906	0.000245339
GAATACCCTGCGTCAATATATGCTTTCCGT	14648	TCAACAACCAATGCTCGGGATGGTCAGGGT	15554	ATAACTTATGGTAATGAAATGCAAGATGTC		1	906	0.000245339
GAATACCCTGCGTCAATATATGCTTTCCGT	14648	AGATTATATTGAAAATACAGATCCTAAAGC	15555			1	907	0.000245339
GAATACCCTGCGTCAATATATGCTTTCCGT	14648	ATATATACTTGCTCAGTTACATACTTACCTA	13710	TTACAACGCGCTAAATCAATGGCTCAACGA		1	-938	0.000245339
GAATACCCTGCGTCAATATATGCTTTCCGT	14648	TGTTCTATGAACGTAATATCAACGGTATGT	15677			1	1029	0.000245339
GAATACCCTGCGTCAATATATGCTTTCCGT	14648	AAGAAATTTGATAGCGCAGACATACAAGCT	13496			1	-1152	0.000245339
GAATACCCTGCGTCAATATATGCTTTCCGT	14648	TTTGTGTTGGTAACTAGCCACTGTGTATAT	13379			1	-1269	0.000245339
GAATACCCTGCGTCAATATATGCTTTCCGT	14648	TATCTTTATTGCTGGAATACTGCGATTATT	13282			1	-1366	0.000245339
GAATACCCTGCGTCAATATATGCTTTCCGT	14648	ACGCTGATAAAAGTAAACTATCGGGTGTAG	16037			1	1389	0.000245339
GAATACCCTGCGTCAATATATGCTTTCCGT	14648	AATGATGATTAAAAAACTTAAAAATATGGAT	13243			1	-1405	0.000245339
GAATACCCTGCGTCAATATATGCTTTCCGT	14648	AATGATGCCTAGTTTAATTGATACTGGAGA	13209			1	-1439	0.000245339
GAATACCCTGCGTCAATATATGCTTTCCGT	14648	AGGTTTAAGCAAGAGGTATTTAAATATGTT	16126			1	1478	0.000245339
GAATACCCTGCGTCAATATATGCTTTCCGT	14648	GAAATCATCTTCAATCTTAGCTTTTTCTTC	13123			1	-1525	0.000245339
GAATACCCTGCGTCAATATATGCTTTCCGT	14648	TATGAAAATATAAGGGAGTGTGGGAAATGA	12605			1	-2043	0.000245339
GAATACCCTGCGTCAATATATGCTTTCCGT	14648	TTAGCATATATTGATACGAATGGTGATGTT	16701			1	2053	0.000245339
GAATACCCTGCGTCAATATATGCTTTCCGT	14648	GCGCTACTTTTATGAAAAAGATGATGATAA	16802			1	2154	0.000245339
GAATACCCTGCGTCAATATATGCTTTCCGT	14648	TTACGATAATACTTATTATTATGTATTTCG	16859			1	2211	0.000245339
GAATACCCTGCGTCAATATATGCTTTCCGT	14648	TGAACATTTATTTGATTACAATCCATTGTT	16928			1	2280	0.000245339
GAATACCCTGCGTCAATATATGCTTTCCGT	14648	GCTATGTCTATCACTATAACAATTGCTTGT	12283			1	-2365	0.000245339
GAATACCCTGCGTCAATATATGCTTTCCGT	14648	TCAGACACGTTTAGCATACCTTGTGTTACG	17060			1	2412	0.000245339
GAATACCCTGCGTCAATATATGCTTTCCGT	14648	TGAAGAAATGATTCAAGAAACACAAAAGAGT	17105			1	2457	0.000245339
GAATACCCTGCGTCAATATATGCTTTCCGT	14648	CGCATGATATTCTTTTCGATTCGATCTAAA	17246			1	2598	0.000245339
GAATACCCTGCGTCAATATATGCTTTCCGT	14648	GAGCTGGAGAAGAAAGCAAGTGCATGGGAT	11472			1	-3176	0.000245339
GAATACCCTGCGTCAATATATGCTTTCCGT	14648	CGTATAGGTACAATGTTGACTGATGACTAT	17872			2	3224	0.000490677
GAATACCCTGCGTCAATATATGCTTTCCGT	14648	GAAGCAACGTGATGAGCTTATTGGGGATAT	11417			1	-3231	0.000245339
GAATACCCTGCGTCAATATATGCTTTCCGT	14648	ATTGAAAAAGATACGTATGCACATTACACA	18105			1	3457	0.000245339
GAATACCCTGCGTCAATATATGCTTTCCGT	14648	TAAAGACAAAAACAACAACGAAATATATGC	11058			1	-3590	0.000245339
GAATACCCTGCGTCAATATATGCTTTCCGT	14648	TTTTAAAGATGTAGAACTTATGCAAAGTAC	11022			3	-3626	0.000736016
GAATACCCTGCGTCAATATATGCTTTCCGT	14648	ACGTTTCTTCATCTTCAAACCGTTATCTTT	18313			1	3665	0.000245339
GAATACCCTGCGTCAATATATGCTTTCCGT	14648	TTCCTGTATATTCGTCCCACACTCGATATTT	10931			1	-3717	0.000245339
GAATACCCTGCGTCAATATATGCTTTCCGT	14648	AAAGTACGAATGAGGAAGAAGCCACGAATA	10785			3	-3863	0.000736016
GAATACCCTGCGTCAATATATGCTTTCCGT	14648	AAGACACGGTATTTGATAAGTTGTTTGAAA	10513			1	-4135	0.000245339
GAATACCCTGCGTCAATATATGCTTTCCGT	14648	CATCAGAATCGCCTAAAAATCTATCAACTA	19323			1	4675	0.000245339
GAATACCCTGCGTCAATATATGCTTTCCGT	14648	TAATATTGATTTCTTTCGCCATTTCTTCAA	19497			1	4849	0.000245339
GAATACCCTGCGTCAATATATGCTTTCCGT	14648	ATAAAATATGGCAACTCCAACATACACGCC	19514			1	4866	0.000245339
GAATACCCTGCGTCAATATATGCTTTCCGT	14648	GAAAAAATTTACTTACTTAGCAAAAGGTGT	19676			9	5028	0.00220805
GAATACCCTGCGTCAATATATGCTTTCCGT	14648	TTCTTTATACTCAGCTAAGCGCATGCCATA	9600			1	-5048	0.000245339
GAATACCCTGCGTCAATATATGCTTTCCGT	14648	TTGATGATGTGGATATCGAAAAAGAAGCGC	9310			1	-5338	0.000245339
GAATACCCTGCGTCAATATATGCTTTCCGT	14648	CAGATACTAATAATTTATACGTAGACCTTT	19987			1	5339	0.000245339
GAATACCCTGCGTCAATATATGCTTTCCGT	14648	CGAGATTATGGGATTACCACTATCTTATAC	20147			1	5499	0.000245339
GAATACCCTGCGTCAATATATGCTTTCCGT	14648	AACATATCACGTTCAAATAATGATACTGGT	20354			1	5706	0.000245339
GAATACCCTGCGTCAATATATGCTTTCCGT	14648	TTTTATCACTCGCTCTTATCAGACGTAGTA	20593			1	5945	0.000245339
GAATACCCTGCGTCAATATATGCTTTCCGT	14648	ATGGAAGTTGACGGAATACTAGAAGATGTT	20674			2	6026	0.000490677
GAATACCCTGCGTCAATATATGCTTTCCGT	14648	GAAACACAATGCGAGAAAAGTAAGAGTAAT	8374			2	-6274	0.000490677
GAATACCCTGCGTCAATATATGCTTTCCGT	14648	GTATGTCGCTTTGATACGATCCATCAACAT	8153			420	-6495	0.103042
GAATACCCTGCGTCAATATATGCTTTCCGT	14648	GTATGTCGCTTTGATACGATCCATCAACAT	8153	AAAAAATTGTGGTTCTTGTAAATTATTTTC		1	-6495	0.000245339
GAATACCCTGCGTCAATATATGCTTTCCGT	14648	GTATGTCGCTTTGATACGATCCATCAACAT	8153	AAAAGTGCATAATAAAAAGCAGTTTAACGA		1	-6495	0.000245339
GAATACCCTGCGTCAATATATGCTTTCCGT	14648	GTATGTCGCTTTGATACGATCCATCAACAT	8153	AAAAGTTTCATTTAAAACCCCTAACCTTACT		1	-6495	0.000245339
GAATACCCTGCGTCAATATATGCTTTCCGT	14648	GTATGTCGCTTTGATACGATCCATCAACAT	8153	AATACTTAGTCACAACATTCAAAGATTCAAC		1	-6495	0.000245339
GAATACCCTGCGTCAATATATGCTTTCCGT	14648	GTATGTCGCTTTGATACGATCCATCAACAT	8153	ACAGCTATGCTGATGCCTTTTTATGGTCGT		1	-6495	0.000245339
GAATACCCTGCGTCAATATATGCTTTCCGT	14648	GTATGTCGCTTTGATACGATCCATCAACAT	8153	AGTAACGAAATCTAGTAATTTACTAGCTATA		1	-6495	0.000245339
GAATACCCTGCGTCAATATATGCTTTCCGT	14648	GTATGTCGCTTTGATACGATCCATCAACAT	8153	ATAAAGACAGTGAATTTTACAGTCGTATGA		1	-6495	0.000245339
GAATACCCTGCGTCAATATATGCTTTCCGT	14648	GTATGTCGCTTTGATACGATCCATCAACAT	8153	ATAAGTTTGCTCCTACTAAAAAACACCCGAAT		1	-6495	0.000245339
GAATACCCTGCGTCAATATATGCTTTCCGT	14648	GTATGTCGCTTTGATACGATCCATCAACAT	8153	ATTTGTTCTTGCGCTTCAATAGTGATAGTAG		1	-6495	0.000245339
GAATACCCTGCGTCAATATATGCTTTCCGT	14648	GTATGTCGCTTTGATACGATCCATCAACAT	8153	CAAATAAAAGGTATGCTCAGATGTTAAAAG		1	-6495	0.000245339
GAATACCCTGCGTCAATATATGCTTTCCGT	14648	GTATGTCGCTTTGATACGATCCATCAACAT	8153	CAGGCGCACCTGCAGCTTCAAACCACTCTTT		1	-6495	0.000245339
GAATACCCTGCGTCAATATATGCTTTCCGT	14648	GTATGTCGCTTTGATACGATCCATCAACAT	8153	CATCTATGAGGAATATAAGAGAAACAAGCAA		1	-6495	0.000245339
GAATACCCTGCGTCAATATATGCTTTCCGT	14648	GTATGTCGCTTTGATACGATCCATCAACAT	8153	CGAATATACAGGAAGAATACACGATGTTGT		1	-6495	0.000245339
GAATACCCTGCGTCAATATATGCTTTCCGT	14648	GTATGTCGCTTTGATACGATCCATCAACAT	8153	CTAAGATAGCTAAAGCAATACGTGATGATGT		1	-6495	0.000245339
GAATACCCTGCGTCAATATATGCTTTCCGT	14648	GTATGTCGCTTTGATACGATCCATCAACAT	8153	GAAAGGTGATAAAGGCGAACCGGGACAACC		1	-6495	0.000245339
GAATACCCTGCGTCAATATATGCTTTCCGT	14648	GTATGTCGCTTTGATACGATCCATCAACAT	8153	GCGCTCTTAAAATGGTTGAAGATGGAACATG		1	-6495	0.000245339
GAATACCCTGCGTCAATATATGCTTTCCGT	14648	GTATGTCGCTTTGATACGATCCATCAACAT	8153	GCTTAACAACTTACTCGTTTCTACACTCAT		1	-6495	0.000245339
GAATACCCTGCGTCAATATATGCTTTCCGT	14648	GTATGTCGCTTTGATACGATCCATCAACAT	8153	GTATGTCGCTTTGATACGATCCATCAACAT		1	-6495	0.000245339
GAATACCCTGCGTCAATATATGCTTTCCGT	14648	GTATGTCGCTTTGATACGATCCATCAACAT	8153	GTGTAATATGCGGAAAGCCTCACGCAGACC		1	-6495	0.000245339
GAATACCCTGCGTCAATATATGCTTTCCGT	14648	GTATGTCGCTTTGATACGATCCATCAACAT	8153	TAAATCTTGAGAGAAATGTTAAAAAGTGTAT		1	-6495	0.000245339
GAATACCCTGCGTCAATATATGCTTTCCGT	14648	GTATGTCGCTTTGATACGATCCATCAACAT	8153	TAGAGCAGACATACAAGCTAGGTTAAAAGT		1	-6495	0.000245339
GAATACCCTGCGTCAATATATGCTTTCCGT	14648	GTATGTCGCTTTGATACGATCCATCAACAT	8153	TATGTTGCCTTTAACCTCACAGTCATATCTAA		1	-6495	0.000245339
GAATACCCTGCGTCAATATATGCTTTCCGT	14648	GTATGTCGCTTTGATACGATCCATCAACAT	8153	TCAACAACCAATGCTCGGGATGGTCAGGGT		1	-6495	0.000245339
GAATACCCTGCGTCAATATATGCTTTCCGT	14648	GTATGTCGCTTTGATACGATCCATCAACAT	8153	TCAGACACGTTTAGCATACCTTGTGTTACG		1	-6495	0.000245339
GAATACCCTGCGTCAATATATGCTTTCCGT	14648	GTATGTCGCTTTGATACGATCCATCAACAT	8153	TCCACGGAATCTTTGTAGCACGACTACCACC		1	-6495	0.000245339
GAATACCCTGCGTCAATATATGCTTTCCGT	14648	GTATGTCGCTTTGATACGATCCATCAACAT	8153	TCGCGAACATCACAACGAGCAACATGCGAT		2	-6495	0.000490677
GAATACCCTGCGTCAATATATGCTTTCCGT	14648	GTATGTCGCTTTGATACGATCCATCAACAT	8153	TCGCGAACATCACAACGAGCAACATGCGATT		1	-6495	0.000245339
GAATACCCTGCGTCAATATATGCTTTCCGT	14648	GTATGTCGCTTTGATACGATCCATCAACAT	8153	TTACATTTAGACACAAATTATATTTTAGATA		1	-6495	0.000245339
GAATACCCTGCGTCAATATATGCTTTCCGT	14648	GTATGTCGCTTTGATACGATCCATCAACAT	8153	TTCGAATACAACCAACCCTAACTACTTACA		1	-6495	0.000245339
GAATACCCTGCGTCAATATATGCTTTCCGT	14648	GTATGTCGCTTTGATACGATCCATCAACAT	8153	TTTAACATTACCAGCTACCAAACCACCTAT		1	-6495	0.000245339
GAATACCCTGCGTCAATATATGCTTTCCGT	14648	GTATGTCGCTTTGATACGATCCATCAACAT	8153	TTTAGCCACTCATATTCTTCAAAGGCCTTT		1	-6495	0.000245339
GAATACCCTGCGTCAATATATGCTTTCCGT	14648	TACGCTATCGCAAAAGCAGTCAAAGCTAAA	8063			1	-6585	0.000245339
GAATACCCTGCGTCAATATATGCTTTCCGT	14648	TTTGCAACCGTCTTTATACTCGTAACCATT	7826			11	-6822	0.00269872
GAATACCCTGCGTCAATATATGCTTTCCGT	14648	TTTGCAACCGTCTTTATACTCGTAACCATT	7826	GCTGAAAAATTCTCAGAAGATAGCGAAGAT		1	-6822	0.000245339
GAATACCCTGCGTCAATATATGCTTTCCGT	14648	TTGCAACCGTCTTTATACTCGTAACCATTC	7825			1	-6823	0.000245339
GAATACCCTGCGTCAATATATGCTTTCCGT	14648	AAAGATTCCGTGGAGTTTTAAAGGTGATGA	21564			1	6916	0.000245339
GAATACCCTGCGTCAATATATGCTTTCCGT	14648	TGTCGAAAAAGGATTGAAATGTGAGAGATG	7717			1	-6931	0.000245339
GAATACCCTGCGTCAATATATGCTTTCCGT	14648	GAAAAAATATCAACCTACTCATGTCGAAAA	7696			1	-6952	0.000245339
GAATACCCTGCGTCAATATATGCTTTCCGT	14648	TTGTTAATTTAAATGATTCTGACATTGCAT	22316			2	7668	0.000490677
GAATACCCTGCGTCAATATATGCTTTCCGT	14648	TAAAATTATACCAGAAAGGAGATAACGAAA	6849			1	-7799	0.000245339
GAATACCCTGCGTCAATATATGCTTTCCGT	14648	AGAAAGCTAGTGTTGTATCTGATTCACACA	22637			1	7989	0.000245339
GAATACCCTGCGTCAATATATGCTTTCCGT	14648	ACTAATGTAAAACTTTGAAGCTTCTAGAGC	6547			1	-8101	0.000245339
GAATACCCTGCGTCAATATATGCTTTCCGT	14648	ATATGTTCGCAAAACTAATAGCATCATCTAT	6531			1	-8117	0.000245339
GAATACCCTGCGTCAATATATGCTTTCCGT	14648	TTACAGCCCCTGGGTAATAGACATCAAAAAA	6044			1	-8604	0.000245339
GAATACCCTGCGTCAATATATGCTTTCCGT	14648	ATTGAGCCTTTTTTGATGTCTATTACCCAG	6005			1	-8643	0.000245339
GAATACCCTGCGTCAATATATGCTTTCCGT	14648	ATACATTACAAGATACCAGAAAGATAACGA	5184	TGGAATTTCTGTCCGCAAAACGCCGGTTAT		1	-9464	0.000245339
GAATACCCTGCGTCAATATATGCTTTCCGT	14648	TTTAAACCACACCTTAAAACGCTAAATCTT	5180			1	-9468	0.000245339
GAATACCCTGCGTCAATATATGCTTTCCGT	14648	AATTGGTCAGATTATGAGAAAAGAAGTAAA	24128			1	9480	0.000245339
GAATACCCTGCGTCAATATATGCTTTCCGT	14648	GTTTTATAACGGCTCAGCAGGGTTTCAAGCT	4665			1	-9983	0.000245339
GAATACCCTGCGTCAATATATGCTTTCCGT	14648	AAATCAAGAAAAGTTTTATAACGGCTCAGC	4653			1	-9995	0.000245339
GAATACCCTGCGTCAATATATGCTTTCCGT	14648	TTCAACCAGCATAGATACTTCAGATAAGAA	24663			1	10015	0.000245339
GAATACCCTGCGTCAATATATGCTTTCCGT	14648	GAAAGCATTTGAAGCATTGAATAGCATAGG	24713			2	10065	0.000490677
GAATACCCTGCGTCAATATATGCTTTCCGT	14648	TCTAATTGCTTCTACTACGTCCGTAATGCT	4575			1	-10073	0.000245339
GAATACCCTGCGTCAATATATGCTTTCCGT	14648	AATTTGTTCTTGCGCTTCAATAGTGATAGTA	4368			1	-10280	0.000245339
GAATACCCTGCGTCAATATATGCTTTCCGT	14648	AGAAGAATACAAATTCCACTTTGTTATTAC	4253			7	-10395	0.00171737
GAATACCCTGCGTCAATATATGCTTTCCGT	14648	TCGTCATTGACATTAACGAAGGTGGAACAA	3961			1	-10687	0.000245339
GAATACCCTGCGTCAATATATGCTTTCCGT	14648	ATTACTTAACACACTGCTAACAGCTGCAAT	25371			1	10723	0.000245339
GAATACCCTGCGTCAATATATGCTTTCCGT	14648	GGAGTAACTAATATCTGAATTGTTATCAGT	3680			1	-10968	0.000245339
GAATACCCTGCGTCAATATATGCTTTCCGT	14648	TCAGACTTATTTAACCAAGCAATAGATGAA	3485			1	-11163	0.000245339
GAATACCCTGCGTCAATATATGCTTTCCGT	14648	AACGGAGGAAGTCAAGATGTATTACGAAAT	3298			1	-11350	0.000245339
GAATACCCTGCGTCAATATATGCTTTCCGT	14648	TCGTGTTGCTTGGAGTGTGGCTGAAAAAATG	26108			1	11460	0.000245339
GAATACCCTGCGTCAATATATGCTTTCCGT	14648	CGCAACACCTACACAAATCCATCAATTGTTT	2860			1	-11788	0.000245339
GAATACCCTGCGTCAATATATGCTTTCCGT	14648	TTGCTAATAGTTTGTTCGGCGAACTTCAAA	2753			1	-11895	0.000245339
GAATACCCTGCGTCAATATATGCTTTCCGT	14648	ATCACAATGGCAGTTGTGACGTGGAAGGTT	2568			1	-12080	0.000245339
GAATACCCTGCGTCAATATATGCTTTCCGT	14648	ATCACAATGGCAGTTGTGACGTGGAAGGTT	2568	CATTTTCTTAGCTTCCATTTCTGCTTGTGCA		1	-12080	0.000245339
GAATACCCTGCGTCAATATATGCTTTCCGT	14648	AGAAGAACTTAAAAAAGTAGAGCTTAAGATA	26923			1	12275	0.000245339
GAATACCCTGCGTCAATATATGCTTTCCGT	14648	TGATTATGTTGATGGACGACAACTTTTTGT	27115			1	12467	0.000245339
GAATACCCTGCGTCAATATATGCTTTCCGT	14648	TAAAACTTTAGAACAACCGGTTTTATATCCA	27589			1	12941	0.000245339
GAATACCCTGCGTCAATATATGCTTTCCGT	14648	CCCTACACCCTGTAGACTTTTTAATAAAAT	27738			1	13090	0.000245339
GAATACCCTGCGTCAATATATGCTTTCCGT	14648	AGTATTGGAATCTGATGAATATTCATCTCT	1453			1	-13195	0.000245339
GAATACCCTGCGTCAATATATGCTTTCCGT	14648	AGGCGTTGAGTTCTTCAATACTGTCTTTAA	28025			1	13377	0.000245339
GAATACCCTGCGTCAATATATGCTTTCCGT	14648	AGGCGTTGAGTTCTTCAATACTGTCTTTAAA	28025			2	13377	0.000490677
GAATACCCTGCGTCAATATATGCTTTCCGT	14648	TTTAGCGATATTAATTATGCTCGTAAGAAT	1211			1	-13437	0.000245339
GAATACCCTGCGTCAATATATGCTTTCCGT	14648	ATAGGTAAAGAAGCGGTAGAAAACAGCATT	29085			1	14437	0.000245339
GAATACCCTGCGTCAATATATGCTTTCCGT	14648	CATACAATCCAGCTTTTAGGAAAGCGAGCA	29473			1	14825	0.000245339
GAATACCCTGCGTCAATATATGCTTTCCGT	14648	TTACGACTAAAGGAGGCAACCAATGGCTTA	29579			1	14931	0.000245339
GAATACCCTGCGTCAATATATGCTTTCCGT	14648	CCAAAATGATTGCATTACTGCATTTGTATA	30093			1	15445	0.000245339
GAATACCCTGCGTCAATATATGCTTTCCGT	14648	GAAAATTATTTATATGACGCAAGCTCGTCC	30107			17	15459	0.00417076
GAATACCCTGCGTCAATATATGCTTTCCGT	14648	GATACCTGCATCATAAGTGATACCTTGCAT	30603			1	15955	0.000245339
GAATACCCTGCGTCAATATATGCTTTCCGT	14648	CAAAGAACCAACCTGCATCTCTAAACGCTTT	31066			1	16418	0.000245339
GAATACCCTGCGTCAATATATGCTTTCCGT	14648	TGTCTTAACATGTTCAGAACTTATAGATAA	31682			1	17034	0.000245339
GAATACCCTGCGTCAATATATGCTTTCCGT	14648	GTTAAAAACCGATGATTATAACGTAGATAG	31690	TCGATGGTGGGTTATCCAGTGTTATAAGTGT		1	17042	0.000245339
GAATACCCTGCGTCAATATATGCTTTCCGT	14648	TTGGCAAAAGTCTAAACTTACAGATGATTA	32248			1	17600	0.000245339
GAATACCCTGCGTCAATATATGCTTTCCGT	14648	TTACTATGCAACAAGAGTGCCGGATTTACCA	32791			1	18143	0.000245339
GAATACCCTGCGTCAATATATGCTTTCCGT	14648	TGATCGTGTGTAAATCTTTTTAGAGTTATA	32930	CTTTGGAAGTTAAAAAGCGTTTTAGCGCTTGT		1	18282	0.000245339
GAATACCCTGCGTCAATATATGCTTTCCGT	14648	GGTATTGTTCGACGGTGGCGCAAATGGTGT	32986			1	18338	0.000245339
GAATACCCTGCGTCAATATATGCTTTCCGT	14648	GGTAAGTCCGAATCCCTCAATAACGCCACC	33116			2	18468	0.000490677
GAATACCCTGCGTCAATATATGCTTTCCGT	14648	ATTGAGTAAAGCGAATGTAGTTGACTCAGA	33136			1	18488	0.000245339
GAATACCCTGCGTCAATATATGCTTTCCGT	14648	CAGATTTAAGTGATGAGGAACTTCGCGGAA	33536			20	18888	0.00490677
GAATACCCTGCGTCAATATATGCTTTCCGT	14648	CAGATTTAAGTGATGAGGAACTTCGCGGAA	33536	AAGGAAGTTGAGTGAATAATAGAAGATGTT		1	18888	0.000245339
GAATACCCTGCGTCAATATATGCTTTCCGT	14648	CAGATTTAAGTGATGAGGAACTTCGCGGAA	33536	TGACAGATAACGCGCGTAAAGAATACTTAAA		1	18888	0.000245339
GAATACCCTGCGTCAATATATGCTTTCCGT	14648	CCGAACTGAAAACTAACAAAACAAATACTGA	33656			1	19008	0.000245339
GAATACCCTGCGTCAATATATGCTTTCCGT	14648	AATGTAAATAACAGTTAAGAGTCAGTGCTT	34283			1	19635	0.000245339
GAATACCCTGCGTCAATATATGCTTTCCGT	14648	CTTTGCCCACTCCACCACTTCACTAGCTGT	34416			1	19768	0.000245339
GAATACCCTGCGTCAATATATGCTTTCCGT	14648	GTTGCCAGGGTGCCAAACTGCGATGTCTCC	34632			29	19984	0.00711482
GAATACCCTGCGTCAATATATGCTTTCCGT	14648	GTTGCCAGGGTGCCAAACTGCGATGTCTCC	34632	ATTTATATCCGATCTTATACGAAGTAAAGAA		1	19984	0.000245339
GAATACCCTGCGTCAATATATGCTTTCCGT	14648	GTTGCCAGGGTGCCAAACTGCGATGTCTCC	34632	CTAATGGTAGATACGGTGCATATAATTACTT		1	19984	0.000245339
GAATACCCTGCGTCAATATATGCTTTCCGT	14648	GGTGTGTCCGTCCGAACCTATTCCGTTGCC	34656	AGCACACTAGAAAACCTGTGATTAGTAGCA		1	20008	0.000245339
GAATACCCTGCGTCAATATATGCTTTCCGT	14648	AATCAAATACAAGCGTTAATACGTGGTGTT	35223	CAGAATTTTAAAGCAAGTGGGTGTGTTGGGC		1	-19790	0.000245339
GAATACCCTGCGTCAATATATGCTTTCCGT	14648	CCCCTAGACATTTGTCTATCCAGTGCTTGC	35612	TCCTCATCACTTAAATCTGACGCACTTTGTG		1	-19401	0.000245339
GAATACCCTGCGTCAATATATGCTTTCCGT	14648	ACCTGCTTCACCTTTTGCACCAGGTTGTCC	36804			1	-18209	0.000245339
GAATACCCTGCGTCAATATATGCTTTCCGT	14648	AAAAGACCCTAATACACTTTACTTAATTAAG	37352			1	-17661	0.000245339
GAATACCCTGCGTCAATATATGCTTTCCGT	14648	ATTACAAAAGATGAAGGCTTTTTCCATACT	37504			1	-17509	0.000245339
GAATACCCTGCGTCAATATATGCTTTCCGT	14648	ATCACTTATAGTGACATACAACATCCCTGA	37754			1	-17259	0.000245339
GAATACCCTGCGTCAATATATGCTTTCCGT	14648	TGCTTGTAGCCGGTCATGGTTATAACGATCC	38703			1	-16310	0.000245339
GAATACCCTGCGTCAATATATGCTTTCCGT	14648	CGCGTTCGTTTGTTCCGTTTCCTACTGCTCC	38766			1	-16247	0.000245339
GAATACCCTGCGTCAATATATGCTTTCCGT	14648	TGCACCGTCATACGTAATTGTTGTGTTGTTG	39485			1	-15528	0.000245339
GAATACCCTGCGTCAATATATGCTTTCCGT	14648	TTATATAGCGACAGGAGAGGTAGACAAGGC	39541			1	-15472	0.000245339
GAATACCCTGCGTCAATATATGCTTTCCGT	14648	CATCTATCCTTGTTCACCCAAGCATGTCAC	39841			1	-15172	0.000245339
GAATACCCTGCGTCAATATATGCTTTCCGT	14648	TAGCCGGGCAGAGGCCATGTATCTGACTGT	40008			1	-15005	0.000245339
GAATACCCTGCGTCAATATATGCTTTCCGT	14648	AAAAGGGCAAACGCTTGTGGAAAAGCTAAAA	40241			1	-14772	0.000245339
GAATACCCTGCGTCAATATATGCTTTCCGT	14648	AGAATGACCGGTTTACCATCATACAAGGAT	40330	TAAGACATGCAGGACATGAAGTTGCATTATA		1	-14683	0.000245339
GAATACCCTGCGTCAATATATGCTTTCCGT	14648					3393		0.832434

## Sheet: T
Colony T
Spacer 1	position	spacer2	position	spacer3	spacer4	# reads	spc1 to spc2 distance	fraction reads
AAAGTTTCTAACTAAAAATTGATGTGCAGAC	31446					18		0.321429
AAAGTTTCTAACTAAAAATTGATGTGCAGAC	31446	TTCTAATTCGCCATTCATGTTCGTGCCGTT	33963			14	2517	0.25
AAAGTTTCTAACTAAAAATTGATGTGCAGAC	31446	TTCTAATTCGCCATTCATGTTCGTGCCGTT	33963	ATGAATGGATTGAAGAGAACACAGACGAAC		1	2517	0.0178571
AAAGTTTCTAACTAAAAATTGATGTGCAGAC	31446	TTCTAATTCGCCATTCATGTTCGTGCCGTT	33963	TTAGCTATTGGTAAGTCGTAAGGTACATAT		21	2517	0.375
AAAGTTTCTAACTAAAAATTGATGTGCAGAC	31446	TTCTAATTCGCCATTCATGTTCGTGCCGTT	33963	TTAGTTATTGGTAAGTCGTAAGGTACATAT		1	2517	0.0178571
AAAGTTTCTAACTAAAAATTGATGTGCAGAC	31446	TTTAACTAATAATAACAATACTAATAATGA	7282			1	16201	0.0178571

[truncated: 17 more sheets: S, R, Q, P, O, N, M, L, K, J, I, D, H, B, E, F, G]
